# Supplementary material for: The odorant receptor repertoire of teleost fish
Source: PubMed Central journal article supplement (PMC1325023; doi:10.1186/1471-2164-6-173), 2005-12-06
Supplement: 1471-2164-6-173-S2.pdf [file 1471-2164-6-173-S2.pdf]

Sequence alignment data showing residues from OR106-12 to OR115-1. Columns are labeled with residue numbers 20, 40, 60, 80. Domains TM1 and TM2 are indicated with arrows. The alignment consists of two rows of sequences for each ORF, with gaps represented by dashes. The right side of the alignment lists protein names and their corresponding residue ranges, such as HKPMYLICN\_AVDVMYSSTCSTTM\_SVLLA (88) and HDPMHFLCNP\_PINDIIGTNVILPRLMDL (86).

Figure S1

↓

TM1

TM2

```

OR115-6 : MD-----NLTITNRILIEGLKVTQHSYYPVIFILLLVYLFIMGCNIGVIVILTEKNL--HHPMHFLFFNPIINDIIGSTVIMPRLLQDILR : 86
OR115-8 : MD-----NLTITNRVIVLVEGLKVTLOSSYPAFILLLLIYVFTVGCNIGVIVILTEKNL--HNPMHFLFCNIPVNDIIGSTVIMPRLLQGIIR : 86
OR115-5 : MD-----NLFTTDFLVEGLKVTYPPSSYPFIFILLFLFYIFAGCNIGLILATEKKL--HHPMHFLFCNIPVNDIIGSTVILPRLLCDIFK : 86
OR115-3P : MDL-----NETFRHSILVEGFRVTPQSTYYPVIFILLLAYVFTVYSNIGLIVLSTTEKNL--HHPMHFLFCNIPVNDIIGSTVIMPRLLDILK : 87
OR116-1 : MEN-----LSIIVSFELTLDPPFIPPGAKYPIFIFIGIFTYMFAPCNLTLLILLTKSL--HKPMYIILFSLPINDFVIGITSMPLPKVSDILT : 87
OR116-2 : MEN-----LSIIVSFELTLDPPFIPPGAKYPIFIFIGIFTYMFAPCNLTLLILLTKSL--HKPMYIILFSLPINDFVIGITSMPLPKVSDILT : 87
OR117-1 : MAG-----NLSNPTFFYLLKIAKFDIDPKAKYPPVFFAGILVYMFVLCNITLLGLIISQKSL--HKPMYIILFSLPINDIIGITAGLPRVVDIVT : 89
OR118-1 : MYP-----NESVFLVLTLSLELPEANIYPAFIFGLTITLFLFCNLTIVITICLNRLN--HKPMYIILLNIPINDVIGATCLFQQLYSIWS : 87
OR118-2 : MYP-----NGSVFPLVLTLSLELPEANIYPAFIFGLTITLFLFCNLTIVITICLNRLN--HKPMYIILLNIPINDVIGATCLFQQLYSIWS : 87
OR118-3 : MYP-----NESVLSVLTLSLELPEANIYPAFIFGLTITLFLFCNLTIVITICLNRLN--HKPMYIILLNIPINDVIGATCLFQQLYSIWS : 87
OR119-1 : MSS-A----VDVYNVSSDLSLQGFDSLPEKAIIAFFFAIVNYIIILCNSTLFTIISNKAL--HEPMHLLLNIPINDIIGSTCLFPHVMRELLF : 89
OR119-2 : MSS-A----VDVYNVSSDLSLQGFDSLPEKAIIAFFFAIVNYIIILCNSTLFTIISNKAL--HEPMHLLLNIPINDIIGSTCLFPHVMRELLF : 89
OR132-5 : MAGSN----GTAEDSSFTYQIFKLDMDLVTSTKTAVAVLTSLEFFVNCVVFALAKSKHIFFTETPRYILFGHLLMNSVLLLVTTVMYVALCF : 91
OR132-1 : MAGSN----GTYNVFPFTHQQVFKLMDMAGTSTKTAVAVLTSLEFFVNCVVFALAKSKHIFFTETPRYILFGHLLMNSVLLLVTTVMYVALCF : 91
OR132-2 : MD-SN----GTSGDVDFLYQQVFLQDWDPLTICETILAVLTSLEFFVNCVVFALAKSKHIFFTETPRYILFGHLLMNSVLLLVTTVMYVALCF : 90
OR132-3 : MD-SN----GTSGDVDFLYQQVFLQDWDPLTICETILAVLTSLEFFVNCVVFALAKSKHIFFTETPRYILFGHLLMNSVLLLVTTVMYVALCF : 90
OR132-4 : MD-SN----GTSGDVDFLYQQVFLQDWDPLTICETILAVLTSLEFFVNCVVFALAKSKHIFFTETPRYILFGHLLMNSVLLLVTTVMYVALCF : 90
OR133-1 : M-----SNSNVTNSNITQ----TITPVRDRDLTKILLSVSSCVIFLYVNGVMVFTLRKKKPVFQETSRYILFGHLLMNSVLLLVTTVMYVALCF : 84
OR133-2 : M-----SNINGSTSNLTQT--LSLVDRDAPVKTFLCVTPCVVFLYVNGVMVFTLRKKKPVFQETSRYILFGHLLMNSVLLLVTTVMYVALCF : 86
OR133-3 : M-----SHLNESTSKLTQ----RLMEQAPVPTFLIVTPCVVFLYVNGVMVFTLRKKKPVFQETSRYILFGHLLMNSVLLLVTTVMYVALCF : 84
OR133-4 : M-----STLNGSTSNNTQ----RLMDQAPMKAFLVTPCVVFLYVNGVMVFTLRKKKPVFQETSRYILFGHLLMNSVLLLVTTVMYVALCF : 84
OR133-6 : M-----SNLNESTSNNTQ----RLMDQYTEVRTFLIVTPCVVFLYVNGVMVFTLRKKKPVFQETSRYILFGHLLMNSVLLLVTTVMYVALCF : 84
OR133-5 : M-----SSLNGSSSNNTQ----RLMDQYVPLKTFLLVTPCVVFLYVNGVMVFTLRKKKPVFQETSRYILFGHLLMNSVLLLVTTVMYVALCF : 84
OR133-7 : M-----SNLNASASNLTQ----RLMDQDAPTKAFLVTPCVVFLYVNGVMVFTLRKKKPVFQETSRYILFGHLLMNSVLLLVTTVMYVALCF : 84
OR133-8 : M-----SNFNESASNLTQ----RLIDQNGPTKAFIVTPSVVFLYVNGVMVFTLRKKKPVFQETSRYILFGHLLMNSVLLLVTTVMYVALCF : 84
OR133-9 : MK-M----SNFNESASNLTQ----GLIDQNTPMKASLIVTPSVVFLYVNGVMVFTLRKKKPVFQETSRYILFGHLLMNSVLLLVTTVMYVALCF : 86
OR137-7 : M-----NSTVLLYSQ----QERYADAFAKNFSTVLLAVIISINGMVFVIFFRSIFHSDDPRYILYIHLVINDMLMVFVSVLVMTFAW : 81
OR137-1 : M-----NSTVLLYSL----QERYSDVFAQNFTVVCVLAIIISINGMVFVIFFRSIFHSDDPRYILYIHLVINDMLMVFVSVLVMTFAW : 81
OR137-2 : MTA-----TNSTRFLYSL----QEYSDSFAKNFTVLLAVIISVINGMVFVIFFRSIFYTDPRYILYIHLVINDMLMVFVSVLVMTFAW : 84
OR137-3 : M-----NSTMFTYTN----VDRYAEAFAKNFSTVLLGLIITVNGMVFVIFFRSIFYNDPRYILYIHLVINDMLMVFVSVLVMTFAW : 81
OR137-8 : M-----NSTMLEYNA----QDRFRDALVRNVIVVIFGITINSINGVVFVIFFRSIFXEDPRYILYIHLVINDMLMVFVSVLVMTFAW : 81
OR137-4 : M-----NSTMLQYNA----QDRFRDALVRNVIVVIFGITINSINGVVFVIFFRSIFVYNDPRYILYIHLVINDMLMVFVSVLVMTFAW : 81
OR137-5 : M-----NSTVLQVNA----QDRFRDALVRNVIVVIFGITINSINGVVFVIFFRSIFVYNDPRYILYIHLVINDMLMVFVSVLVMTFAW : 81
OR136-2P : MN-----STIWI----VDSYEALAKNIVIVSLGFIINVINGMVFVIFFRSIFVYNDPRYILYIHLVINDMLMVFVSVLVMTFAW : 78
OR136-1 : MCSCL----FSSTEMNTVWI----VDNYQEAITKHIVIVLALIVNVINGMVFVIFFRSIFVYNDPRYILYIHLVINDMLMVFVSVLVMTFAW : 88
OR135-2 : MN-----SLELNTTRRKDFLWEAIFKNIIVVGLGIIINFINSLFYTFKKNPVLMQEPYILYMQIINDIILLSVCVTLFVITNSL : 82
OR135-1 : MN-----SSNNKQ----DFLGDVCFKSFVVLVGLVINCINSLFYTFKKNPVLMQEPYILYMQIINDIILLSVCVTLFVITNSL : 82
OR140-1P : MNN-----TLPADPFY----EKFKNFISVALGLIINFINSLFYTFKKNPVLMQEPYILYMQIINDIILLSVCVTLFVITNSL : 77
OR134-1 : MN-----STAGQQLL----RDTFAMAFMKNFIVLVVFLLSYINGSVATFFRHHQIFVEDPRYILYIHLVINDMLMVFVSVLVMTFAW : 82
OR129-1 : MQN-----LTELPAANTSSNLSVIVKVCVMPFIIFAFVFFILLTYTFASHRQFFDSSRVLFVLYLINDITLLLFSSVALFLAMAG : 84
OR131-1 : MN-----STSNSSLN----TFIMKSLKEKALLVQVIVGLIIVVINGMVFVIFFRSIFVYNDPRYILYIHLVINDMLMVFVSVLVMTFAW : 81
OR131-2 : MN-----STSNSSLN----TFISKTLKEKSLTVQVIVGLIIVVINGMVFVIFFRSIFVYNDPRYILYIHLVINDMLMVFVSVLVMTFAW : 81
OR130-1 : MS-----SYNSSGDEMQQLIQVDPVRRNIISLALTOVIVVWPFVYLIIFMLLIFSKKETFTTEMRYILFGHSLVLDITFLLLTDFVVLVLSYNL : 86

```

Figure S1



OR115-1 : DSSERYTSYAEVQVQAYFVHFLFAIACHYVITIMAFDRYVAICNPLRYTAMTNKMMVKLSASAAGLSIFMVSILLGLTIRLSRCSRYS--TENPFCDNA : 182  
 OR115-6 : EASERYTYVECVVQAYFVHIFAAASHYVILIMAFDRYMAICNPLRYTAMTNKMMVKLSALAGWSVSVTILISLTLRLSRCSRNS--TENPFCDNA : 182  
 OR115-8 : EASQRYTYTECVVQAFFVHVFASVSHSVIIMAFDRYVAICNPLRYAAMSNKMMVRLSALAGVSVIATVVMIALSLRLSRCSRYS--TENPFCDNA : 182  
 OR115-5 : QTSERSMTYVECVVQAYFVHIFFTASHTAVTMAIDROYAICNPLRYTAMTDKMMVKLSATAATLPIIVVAVMIGLTVRLSRCSRK--TENPFCDNA : 182  
 OR115-3P : DTLQRYITIMEGVLPKPYFGHILISTCHYVPIVAVFVRLAIFONPLRYSAAMTNKMMVKLSASAGLAAILLVTIMLGLTIRLSHCRSK--TENPFCDNA : 183  
 OR116-1 : ET--NNMYYPVLCVLQGFLLHMYGGGVFMVIAAMAFDRYIAICNPLRYNAIMTPRAVMTVVALVGLVFLIICVFLSLHGLHSRCSRSH--VSLFCODNP : 181  
 OR116-2 : ET--NKTYYPVLCVLQGFLLHMYGGGVLFVIAAMAFDRYIAICNPLRYNAIMTPRAVMGIVALVGLDLFFIILLFALQSKYSRCSRSD--LNVFCODNP : 181  
 OR117-1 : ET--NDVYYPVLCVLQGFLLHLYGGGTLFLIAAMSLDRYIAICNPLRYNASIMTPSRIFGLIAFAAGLDFAVITVLFSLQARLVKCKSF--TNVFCODNP : 183  
 OR118-1 : QD--RSISYSACLQGFVHLYGGGASYLITAMAYDRYITICNPLRYGAMTNNLLRIIIGMLFNVVAITVICVLLLPYICQTH--MDDLVCYKT : 181  
 OR118-2 : QD--TSSYPACLLQGFIVHLYGGGASYVITAMAYDRYIATCPLRYGAMNSNLLKIITGMVFNFTVITVLFSLLLPKYICRTH--MDDLFCYNP : 181  
 OR118-3 : QD--RSITYSACLQGFVHLYGGGASHVITAMAFDRYIAICNPLRYGAMTPSNLMRIISVMVFIHFVILFVLFCLLMPHRIQTY--MADLFCYNP : 181  
 OR119-1 : DT--RTMSFSVCTQAFVHLYAVSAVFIAMAYDRYVAICQPMRYTTMTNIHLAKIISLVLSNLTLMMAVLFILLRPRCRSF--LNHPFCODNP : 183  
 OR119-2 : DT--RTMSFSVCTQAFVHLYAVSTVFIAMAYDRYVAICQPMRYTTMTNIHLAKIISLVLSNLTLMMAVLFILLRPRCRSF--LNHPFCODNP : 183  
 OR132-5 : ----LPIPKSICLLLVFISHCTFRNAPLITAMSLBRYVAICPLRHCTIATPKRTGIGIIGIIFLSTINIITDIILALILNPNF--ADFIFCTLE : 181  
 OR132-1 : ----LPIPKSICLLLVLSYCTFFNAPLITAMSLBRYVAICPLRHCTIATPKRTGIGIIGIIFLSSVNVVIDIILALINPNF--ADFIFCTLE : 182  
 OR132-2 : ----YPIHKSICLLLVFTSTLAFINAPLITAMSLBRYVAICPLRHCTIATPKRTGIGIIGIIFLSTINVIDIILALVNNPNYL--ADIAFCTLE : 181  
 OR132-3 : ----YPIHKSICLLLVFITHCAFRNAPLITAMSLBRYVAICPLRHCTIATPKRTGIGIIGIIFLSSINVIDIILALVNNPNYL--ADIAFCTLE : 181  
 OR132-4 : ----YPIHKSICLLLVFITHCAFRNAPLITAMSLBRYVAICPLRHCTIATPKRTGIGIIGIIFLSSVNVVIDIILALVNNPNYL--ADIAFCTLE : 181  
 OR133-1 : ----PVMKIVCLLLVAATALYQVSTLNLAMSLBRYVAICPLRHAEITTYGRTNMAIGVIMISWVQLSEIIVFYSIDTNTI--AVNLFCSRT : 175  
 OR133-2 : ----IFLKNICLLLLAAQSLYQVALLNLAMSLBRYVAICPLRHAEITTYGRTNMAIGVIMISWVQLSEIIVFYSIDTNTI--AVNLFCSRT : 177  
 OR133-3 : ----ILIMKNVCLLLVSATALYQISTLNLAMSLBRYVAICPLRHAEITTYGRTNMAIGVIMISWVQLSEIIVFYSIDTNTI--AVNLFCSRT : 175  
 OR133-4 : ----ILIMKNVCLLLVIAATSLYQISTLNLAMSLBRYVAICPLRHAEITTYGRTNMAIGVIMISWVQLSEIIVFYSIDTNTI--AVNLFCSRT : 175  
 OR133-6 : ----ILIMKNVCLLLVIAATSLYQVATLNLAMSLBRYVAICPLRHAEITTYGRTNMAIGVIMISWVQLSEIIVFYSIDTNTI--AVNLFCSRT : 175  
 OR133-5 : ----ILIMKNVCLFLVIAATSLYHISILNLAMSLBRYVAICPLRHAEITTYGRTNMAIGVIMISWVQLSEIIVFYSIDTNTI--AVNLFCSRT : 175  
 OR133-7 : ----ILIMKNVCLLLVIAATSLYQVATLNLAMSLBRYVAICPLRHAEITTYGRTNMAIGVIMISWVQLSEIIVFYSIDTNTI--AVNLFCSRT : 175  
 OR133-8 : ----ILIFRNICLALVIAAGKALFHVSIILNLAMSLBRYVAICPLRHAEITTYGRTNMAIGVIMISWVQLSEIIVFYSIDTNTI--AVNLFCSRT : 175  
 OR133-9 : ----ILIFRNICLALVIAAGKALFHVSIILNLAMSLBRYVAICPLRHAEITTYGRTNMAIGVIMISWVQLSEIIVFYSIDTNTI--AVNLFCSRT : 175  
 OR133-9 : ----FLIFRNICLALVIAAGKALFHVSIILNLAMSLBRYVAICPLRHAEITTYGRTNMAIGVIMISWVQLSEIIVFYSIDTNTI--AVNLFCSRT : 177  
 OR137-7 : ----HNVVPVFCVLLLLITISVTHRNTPLTAGMAIBRYIAVCKPLHHHQCTVRRTYILISLISVGLPLGLDIFILLINGPLAL--FT-TIQTSV : 171  
 OR137-1 : ----HNVVPVFCVLLLLIISTAYKNTPLTAGMAIBRYIAVCKPLHHHQCTVRRTYILISLISVGLVPLGLAELILLIIRPLAV--FTRTQASV : 172  
 OR137-2 : ----QNVPIPFCVLLLIISATHKNTPLTAGMAIBRYIAVCKPLHHHQCTVRRTYILISLISVGLVPLGLADLILLIIRPLAV--FTRTQASV : 176  
 OR137-3 : ----QNVVPVFCVLLLIISATHKNTPLTAGMAIBRYIAVCKPLHHHQCTVRRTYILISLISVGLVPLGLADLILLIIRPLAV--FTRTQASV : 172  
 OR137-8 : ----QNVVPVFCVLLLIISATHKNTPLTAGMAIBRYIAVCKPLHHHQCTVRRTYILISLISVGLVPLGLADLILLIIRPLAV--FTRTQASV : 172  
 OR137-4 : ----QNVVPVFCVLLLIIVAKTQNTPLTAGMAIBRYIAVCKPLHHHQCTVRRTYILISLISVGLVPLGLADLILLIIRPLAV--FTRTQASV : 172  
 OR137-5 : ----RNVPIPFCVLLLIISATHKNTPLTAGMAIBRYIAVCKPLHHHQCTVRRTYILISLISVGLVPLGLADLILLIIRPLAV--FTRTQASV : 172  
 OR136-2P : ----PLVNASLCCILLVLGTTTFMITPLNAGMAIBRYIAVCKPLHHHQCTVRRTYILISLISVGLVPLGLADLILLIIRPLAV--FTRTQASV : 170  
 OR136-1 : ----PVMNASLCCILLVLSLGVKVFMTPLNAGMAIBRYIAVCKPLHHHQCTVRRTYILISLISVGLVPLGLADLILLIIRPLAV--FTRTQASV : 180  
 OR135-2 : ----PVMNASLCCILLVLSLGVKVFMTPLNAGMAIBRYIAVCKPLHHHQCTVRRTYILISLISVGLVPLGLADLILLIIRPLAV--FTRTQASV : 173  
 OR135-1 : ----PVMNASLCCILLVLSLGVKVFMTPLNAGMAIBRYIAVCKPLHHHQCTVRRTYILISLISVGLVPLGLADLILLIIRPLAV--FTRTQASV : 170  
 OR140-1P : RA--PSNGSNCAPETICFLSILGKNTPLNAGMAIBRYIAVCKPLHHHQCTVRRTYILISLISVGLVPLGLADLILLIIRPLAV--FTRTQASV : 171  
 OR134-1 : ----YTHSVGVCFFILLVAVFTTRSPVNLAMSLBRYIAVCKPLHHHQCTVRRTYILISLISVGLVPLGLADLILLIIRPLAV--FTRTQASV : 174  
 OR129-1 : ----VQFAIYCAPLLEFSTATFLNTPLISTAMSLBRYIAVCKPLHHHQCTVRRTYILISLISVGLVPLGLADLILLIIRPLAV--FTRTQASV : 176  
 OR131-1 : ----LITHNISYVFTVMSVLSICSPVTAMSLBRYIAVCKPLHHHQCTVRRTYILISLISVGLVPLGLADLILLIIRPLAV--FTRTQASV : 173  
 OR131-2 : ----LITHNISYVFTVMSVLSICSPVTAMSLBRYIAVCKPLHHHQCTVRRTYILISLISVGLVPLGLADLILLIIRPLAV--FTRTQASV : 173  
 OR130-1 : ----VLPLQFCIPVCMFIEETVAVASPLITAGMAIBRYIAVCKPLHHHQCTVRRTYILISLISVGLVPLGLADLILLIIRPLAV--FTRTQASV : 178

Figure S1



OR115-1 : SLFKLSC-ES-VII-NNIFGMVSVVFTLSLGSFVTVYKGTASVCITSKN--KSLNSKAIKTCSTHIAVYLIMFISCASFIFLHRV---P----EY : 267  
 OR115-6 : SLFKLSC-ED-VVV-NNVYGICTTILVSVFSLGSVFIITVYAKTATVCTSKN--KSFNRKAIQTCGTHIAVYLIMFVSSVIMVFLHRS--PP----QY : 268  
 OR115-8 : SLFKLSC-EEGVVI-NNLFGIFSTVVMFTFSLGSVFIITVYKGTAAASFRNRKH--NSFNSKAMKTCGTHIALYLIMFVSCAIMIFLHRS---P----QH : 268  
 OR115-5 : SLYKLS-EN-VAI-NNIFGIVSVAALIISVALMVAIARIVTACISKS--KALNSKAIKTCSSHIAVYLIMFVSCAIMIFFHRF---P----EY : 267  
 OR115-3P : SLFKLSC-ES-VVI-NNIYGIVYVAVLCPFAVSHFITVYKDAVCKTSKS--KALNSKAVKTCSTHIAVYLIMFVSSGATMTFLHRF---P----EY : 268  
 OR116-1 : SLLKLLAC-GD-TTI-NNIYGLFLTAIMQIITISIQAFSYVKILITCLTTRR--SDAKSKAINTCVAQVIFITFETVVTFFYLLSHRF--SN----VN : 267  
 OR116-2 : SLLKLLTC-SN-TIV-SNIIGLFNTAMIQIISVSIQAFSYVKILITCLATSK--SDAKSKAINTCVSQVIFIMFETVATFFILSHRF--TS----VN : 267  
 OR117-1 : SVLLSCGGD-LSV-NNIYGLFLTAFIQITSVFIQMFSGYGCIVITCVKQTH--ADSRVKALNTCVAQFTTFFILFEMVTAVAIISYRI--PD----FP : 270  
 OR118-1 : PMKLLC-DG-IEV-NNIYGLCCIIFYHGLALSVAFTYIHILITCVTNKQ--SDARVKALQTCGTHLVVFLLEINTLFPFLAHR--EI----IP : 267  
 OR118-2 : SHMKLMC-ED-TTV-NNIIGLISLVLYHCIALSVAFTYIHILITCVTNKQ--SDAKMKALQTCGTHLVVFLFLEFNTLFPFLAHR--ES----VP : 267  
 OR118-3 : SHMKLMC-ED-TTV-NNMYGLFILSLYHSLPLSVAFTYIHILITCVTNKQ--SDAKMKALQTCGTHLVVFLFLEFNTLFPFLAHR--ES----IP : 267  
 OR119-1 : SLLQLVC-AD-TTI-NNIYGLLMTAVSQVCSLGLIMYSYLRILITACFRNR--SDTRSKALQTCGTHLVVFLFLEFNTLFPFLAHR--ES----IP : 269  
 OR119-2 : SLLQLVC-AD-TTI-NNIYGLLMTAVSQVCSLGLIMYSYLRILITACFRNR--SDTRSKALQTCGTHLVVFLFLEFNTLFPFLAHR--ES----IP : 269  
 OR132-5 : KLFVFKW-----QIDKNQWFDVLYFASVALIIFFTYIMIMITARSVSSD-KDSAKKALKTVMLHIIQLGLCLTSFLYVTIERTLYMVTGSDSSLF : 270  
 OR132-1 : KLYIAKW-----QIDKQGFVLYFVSVAVIIFFTYIMIMITARSVSSD-KESAKKALKTVMLHIIQLGLCLTSFLYATIERTLYMVTGSDSSLF : 271  
 OR132-2 : QLYIGKW-----QVDKAQVFSVYFVSVALLIIFFTYIMIMITARSVSSD-KESAKKALKTVMLHIIQLGLCLTSFLYATIERTLYMVTGSDSSLF : 270  
 OR132-3 : KLYIAKW-----QVDKAQWFDVLYFVSVAVIIFFTYIMIMITARSVSSD-KDSAKKALKTVMLHIIQLGLCLTSFLYATIERTLYMVTGSDSSLF : 270  
 OR132-4 : KLYIAKW-----QVDKAQWFDVLYFVSVAVIIFFTYIMIMITARSVSSD-KDSAKKALKTVMLHIIQLGLCLTSFLYATIERTLYMVTGSDSSLF : 270  
 OR133-1 : TFRLQI-----YKNLDVAFTCVYFVSVCFIIFFTYASTAAVAKTASGD-KASAKKATKTVLLHIIQLGLCAASILIGVIEQVIYVFTSYA--TI : 262  
 OR133-2 : TFRLQI-----YKLEIAFTCFVFLVSVFVIFFTYASTAAVAKTASGD-KASAKKANKTVLLHIIQLGLCAASILIGVIEQVIYVFTSYA--TI : 262  
 OR133-3 : TFRLQI-----YKLEIAFTSMFLVLSVVIIFFTYASTAAVAKTASGD-KASAKKANKTVLLHIIQLGLCAASILIGVIEQVIYVFTSYA--TI : 262  
 OR133-4 : TFRLQI-----YKLEIAFTSMFLVLSVVIIFFTYASTAAVAKTASGD-KASAKKANKTVLLHIIQLGLCAASILIGVIEQVIYVFTSYA--TI : 262  
 OR133-6 : TLRLQI-----YKLDIAFTSMYFALASVVIIFFTYASTAAVAKTASGD-KMSAKKANKTVLLHIIQLGLGASSILAGVIEQVIYVNTDLM--TA : 262  
 OR133-5 : TLRLQI-----YKLDIAFTSMYFALASVVIIFFTYASTAAVAKTASGD-KMSAKKANKTVLLHIIQLGLGASSILAGVIEQVIYVNTDLM--TA : 262  
 OR133-7 : TFRLQI-----YKLDIAFTSMYFALASVVIIFFTYASTAAVAKTASGD-KMSAKKANKTVLLHIIQLGLGASSILAGVIEQVIYVNTDLM--TA : 262  
 OR133-8 : ALFKLQI-----YKSIDIAFTCFVFLVSVFVIFFTYASTAAVAKTASGD-KLSAKKANKTVLLHIIQLGLGASSILVGVIEQVIYVNTDLM--TA : 262  
 OR133-9 : IFRLQI-----YKSIDIAFTCFVFLVSVFVIFFTYASTAAVAKTASGD-KLSAKKANKTVLLHIIQLGLGASSILVGVIEQVIYVNTDLM--TA : 262  
 OR137-7 : ILYNTPS-----HAELSKIISNGIYSSIVWLLIIVYQVVMKAKRSTN-KSSAKKQSTILLHIXQLLCLMSYITPVLDKIYAPLQ--E--QQ : 257  
 OR137-1 : TVYSTPY-----HVELTTFMNGIYSSIVWLLIIVYQVVMKAKRSTN-KSSAKKQSTILLHIXQLLCLMSYITPVLDKIYAPLQ--E--QQ : 258  
 OR137-2 : ILYITPY-----HEVQNKCMNGIYSSIVWLLIIVYQVVLTAARKASTN-KSSAKKQSTILLHIXQLLCLMSYITPVLDKIYAPLQ--E--QQ : 262  
 OR137-3 : NYYSTPY-----HEEQSKITHGYTTVVVWLLIIVYQVVLTAARKASTN-KSSAKKQSTILLHIXQLLCLMSYITPVLDKIYAPLQ--E--QQ : 262  
 OR137-8 : KLYNTPY-----HEELSKYMTGYTCVWLLIIVYQVVLTAARKASTD-KSSAKKQSTILLHIXQLLCLMSYITPVLDKIYAPLQ--E--QQ : 258  
 OR137-4 : KLYNTPY-----HEELSKYMSIYASAVLLIIVYQVVLTAARKASTD-KSSAKKQSTILLHIXQLLCLMSYITPVLDKIYAPLQ--E--QQ : 258  
 OR137-5 : RLYNTPY-----HEELSKYMTGYSSGVWLLIIVYQVVLTAARKASTD-KSSAKKQSTILLHIXQLLCLMSYITPVLDKIYAPLQ--E--QQ : 258  
 OR136-2P : SLFPSKA-----HKDRRTASQVYMSVWVWIIIFHYCRVLFATKRAIS--KGSVNRKARSTILLHIXQLLCLMSYITPVLDKIYAPLQ--E--QQ : 256  
 OR136-1 : YMFPSKA-----HDDHNTASQVYMSVWVWIIIFHYCRVLFATKRAIS--KGSVNRKARSTILLHIXQLLCLMSYITPVLDKIYAPLQ--E--QQ : 265  
 OR135-2 : SVFSEFY-----NIISAVFNIGYMSVWVWIIIFHYCRVLFATKRAIS--KGSVNRKARSTILLHIXQLLCLMSYITPVLDKIYAPLQ--E--QQ : 259  
 OR135-1 : NVDFEY-----HVISHAVFNIVYMSVWVWIIIFHYCRVLFATKRAIS--KGSVNRKARSTILLHIXQLLCLMSYITPVLDKIYAPLQ--E--QQ : 256  
 OR140-1P : FVYNSWE-----HSIKETVNVVYLSLVWISIIITVYFNVLSAANAASAD-RTSAKKGRNTIFLAVQLLCLMSYITPVLDKIYAPLQ--E--SR : 257  
 OR134-1 : NVFKDPV-----LLYKRQAFDGIYFSLVFTLITVYKIMTAHSHSTE-NTSAKKATNTILLHIXQLLCLMSYITPVLDKIYAPLQ--E--SR : 260  
 OR129-1 : ILNASPI-----QALFKVSLNGLIFFAVVAVVLLFVYIRILLETERRMRQD-RTTVRAKALHTVLLHIXQLLCLMSYITPVLDKIYAPLQ--E--SR : 262  
 OR131-1 : VMLQVKW-----LADTRATSQQLLFVIMLCIVGSIYKIMTAARSASATNKKSTYKGLRNVILHIXQLLCLMSYITPVLDKIYAPLQ--E--SR : 260  
 OR131-2 : VMFQVKW-----LAEMRALSQQLLFVIMLCIVGSIYKIMTAARSASATNKKSTYKGLRNVILHIXQLLCLMSYITPVLDKIYAPLQ--E--SR : 260  
 OR130-1 : IMIPEKI-----RVFARGLLYIVGLVLLIIEFCYVMITVLAARAASGDNKKSSAKKQRTISLHIXQLLCLMSYITPVLDKIYAPLQ--E--SR : 265

Figure S1

TM7
↓

300
\*
320
\*
340
\*
360
\*

```

OR106-12 : LTERNAAILITASLVSPPLINPTVYCTRTRKEIRKRLANVFLHRKTVPNPLKLSISKGSSS----- : 326
OR106-11 : LTERNAAILITASLVSPPLINPTVYCTRTRKEIRKRLANVFLHRKTVPNP----- : 315
OR106-1 : LTERNAAILITASSLPPLINPTVYCTRTRKEIRKRLADVFLHRKVAPNNLKVLA----- : 319
OR106-2 : LTRDRNAAILITASSLPALINPVVYCTRTRKEIRKRLADVFLHRKIVPGHFHFKVIS----- : 320
OR106-3 : LTERNAAILITASSLPALINPVVYCTRTRKEIRKRLADVFLHRKIVPGQFKVIS----- : 320
OR106-4 : LTERNAAILIVSVLSPPLINPTVYCSRTRKEIRKRLSDVLMRKKKISPSNF----- : 316
OR106-6 : LTERNAAILIVSVLSPPLINPTVYCTRTRKEIRKRVSDVFLHSKKLIVPRDFKSFNPNTLSS----- : 326
OR106-8 : LTERNAVAVIVSCVYVSLLVNPTVYCTRTRKEIRKRIITDIFLYTQKITK----- : 314
OR106-9 : LTERNAVAVIVSCVYVSLLVNPTVYCTRTRKEIRKRIITDIFLYTQKITK----- : 313
OR106-10 : LTERNAVAVIVSCVYVSLLVNPTVYCTRTRKEIRKRIITDIFLYTQKITK----- : 313
OR106-7 : LTERNAIMIVSVLSPPLINPTVYCTRTRKEIRKRLDIFLRRKIPAPNHLKISSVNLSS----- : 325
OR106-5 : VTRDRNAAILTAASLVPLINPTVYCTRTRKEIRRRLLSDFFLSTKILPNNFK----- : 316
OR108-1 : PSVRTVCLSLSSVLPCCANPVIYSLKTKEIRSKVILNLRRLSVHPLKKNVH----- : 321
OR108-2 : SNVRSVCLSMSTSLTPCVPNPLVYSLKTKEIRSRVYVFLPQRLSVHPLKSAQ----- : 326
OR108-3 : PNUGVCLSLSSVLPCCANPVIYSLKTKEIRSRVYVFLPQRLSVHPLKKNVH----- : 325
OR110-1 : TNTRIINLSLTSALPPMNPPIYTFMTEEFMVAVKRLLFRNRNIFPSWK----- : 319
OR110-2 : TNTRIINLSLTSALPPMNPPIYTFMTEEFMVAVKRLLFRNRNIFPSWK----- : 318
OR109-1 : PNQIINNSLTSALPPMNPPIYTLKTEEMQSIKDLRYRRSKVNIQKQRMKPFASMVN----- : 329
OR109-2 : PNTRLINHSLSLQTHSPMNPPIYTLKTEEMQSIKDLRYRRSKVNIQKQRMKPFASMVN----- : 336
OR109-4 : LNTRLINNSLTSALPPMNPPIYTLKTEEMQSVKELYKRRKVVNTTERRMKWNSRNSKQKIQV----- : 338
OR109-3 : ANIRLINNSLTSALPPMNPPIYTLKTEEMQSIKELYNGRNVKNIQKQRMKPFASMVN----- : 334
OR109-5 : PNTRIFNNSLRQVLESMNPPIYTLKTEEMESIKDLRYRRKINTAIERKMKCERGN----- : 329
OR109-6 : PNTRIFNNSLRQVLESMNPPIYTLKTEEMESIKDLRYRRKINTAIAKRI----- : 325
OR109-9 : PNTRIFNNSLRQVLESMNPPIYTLKTEEMESIKDLRYRRKINTAIAKRI----- : 325
OR109-7 : SDIQIINNSLTSALPPMNPPIYTLKTEEMQSVKELYKRRSRMNTIRVSKTKC----- : 325
OR109-10 : SDIQIINNSLTSALPPMNPPIYTLKTEEMQSVKELYKRRSRMNTIRVSKTKC----- : 325
OR109-8 : PNARLINNSLTSALPPMNPPIYTLKTEEMQSIKELYKRRSRVYATMEQNRKCHGRKLNDFKVFALDFKC----- : 343
OR109-11 : PNARLINNSLTSALPPMNPPIYTLKTEEMQSIKELYKRRSRVYATMERNRKNCHGRK----- : 332
OR111-1 : PNARVISTSLSYAVPPLINPTIYVLTAEIKDLIRKMLKRSRAPSIRENISK----- : 326
OR111-2 : PNARVISTSLSYAVPPLINPTIYVLTAEIKDLIRKMLKRSRAPSIRENISK----- : 326
OR111-3 : PNARVISTSLSYAVPPLINPTIYVLTAEIKDLIRKMLKRSRAPSIRENISK----- : 326
OR111-4 : TNARVISTSLSYAVPPLINPTIYVLTAEIKDLIRKMLKRSRAPSIRENISK----- : 326
OR111-5 : PNARVISTSLSYAVPPLINPTIYVLTAEIKDLIRKMLKRSRAPSIRENISK----- : 326
OR111-10 : PNARVISTSLSYAVPPLINPTIYVLTAEIKDLIRKMLKRSRAPSIRENISK----- : 326
OR111-7 : SNSRVISTSLSYAVPPLINPTIYVLTAEIKNTIRKGFKNRSLPIETVSK----- : 325
OR111-6 : PNARVISTSLSYAVPPLINPTIYVLTAEIKDLIRKMLKRSRAPSIRENISK----- : 325
OR111-9 : PNARVISTSLSYAVPPLINPTIYVLTAEIKDLIRKMLKRSRAPSIRENISK----- : 314
OR111-11 : PNARVISTSLSYAVPPLINPTIYVLTAEIKDLIRKMLKRSRAPSIRENISK----- : 325
OR111-8 : LNARVISTSLSYAVPPLINPTIYVLTAEIKDLIRKMLKRSRAPSIRENISK----- : 324
OR107-1 : VDLTALITVSVTPEAMNPPIYSLKTDEIKERMVLFQSKVAQQI IKTEVKALQO----- : 331
OR104-1 : KAEKIALVMFYSLPPLMNPPIYFIRIREIRQVFLKCCAQRKRMISSTTVSK----- : 327
OR104-2 : NNEKIALVMFYSLPPLMNPPIYFIRIREIRQVFLKCCAQRKRMISSTTVSK----- : 319
OR105-1 : KDFRILLVLIYCLVPLVNPPIYCLRTQERMIIVSRVSRQALRVACKINVTIL----- : 325
OR103-1 : TDLRLAIMMYSVLPPLINPTIYCLRTEEVKVLRRQFHSKQIGNPLQLL----- : 328
OR103-5 : TDLRLAIMMYSVLPPLINPTIYCLRTEEVKVLRRQFHSKQIGNPLQLL----- : 320
OR103-2 : TDLRLAIMMYSVLPPLINPTIYCLRTEEVKVLRRQFHSKQIGNPLQLL----- : 314
OR103-3 : TDLRLIIIMSSOLPPMNPPIYSLRTEEDKILKRPFPQNKILGFPLQLL----- : 320
OR103-4 : TDLRLINVMNSLPPMNPPIYCLRTEEVKVLRRQFHSKQIGNPLQLL----- : 318
OR102-1 : PGRVMLIMWYTLPPPIVNPPIYCFRTKEIKDALIKKLLKDRKVNQVQI----- : 315
OR102-3 : PSFRIAITLCSCLLPVVPNPPIYCFRTKEIKDALIKKLLKDRKVNQVQI----- : 328
OR102-4 : PSFRIAITLCSCLLPVVPNPPIYCFRTKEIKDALIKKLLKDRKVNQVQI----- : 326
OR102-5 : PSFRIALSCLFCLLPVVPNPPIYCFRTKEIKDALIKKIRHASVNOVIL----- : 317
OR102-2 : NDRTRMVMYSVLPPLINPTIYCFRTKEIKDALIKKIRHASVNOVIL----- : 327
OR101-1 : PEVRIMIALLYSVLTPPLINPTIYSLRNLKEIQDAMKRAFCKCAVRSEVARKTVPSVA----- : 316
OR113-1 : SNNRIFISIVYLFSCFHPPIYGWRTKEIRQTFLEFIPKHAHIFPLEK----- : 317
OR113-4 : SNNRIFISIVYLFSCFHPPIYGWRTKEIRQTFLEFIPKHAHIFPLEK----- : 316
OR113-2 : SNNRIFISIVYLFSCFHPPIYGWRTKEIRQTFLEFIPKHAHIFPLEK----- : 317
OR113-3 : SNNRIVISVMYLCFSCFHPPIYGWRTKEIRQMFLEFIPKHAHIFPLEK----- : 315
OR114-1 : RDIRVLTMSYLFVTPPIVNPPIYGIRTRKEIKAQIVKYLKSNKVGSI----- : 314
OR112-1 : IDVNTPLGVMYIVFASVNPPIYGVTRKEIRKALFIPKNIKNSIVKVTSTIRN----- : 327
OR124-3 : RVVYTFLSIINLTPPPIVNPPIYGIKLPTRAKILYIFRKLRLINNL----- : 310
OR124-2 : HVVYTFLSIINLTPPPIVNPPIYGIKLPTRAKILYIFRKLRLINNL----- : 310
OR124-1 : HVVYTFLSIINLTPPPIVNPPIYGIKLPTRAKILYIFRKLRLINNL----- : 308
OR124-4 : HFVHMFLSVIFLTPPIVNPPIYGIKLPTRAKILYIFRKLRLINNL----- : 313
OR123-1 : QEFKNFLSVTFMIPPLINPTIYGVTLTPRTKAKHVQSFPRPKHID----- : 311
OR126-1 : QDLRNFMSLEFLLPPIVNPPIYGLNLTREVRVVMRCFLK----- : 319
OR126-2 : QSLRNFMALEFLLPPIVNPPIYGLKLTAVRQEVIRLFYKSRQ----- : 309
OR126-3 : QDLRNFMALEFLLPPIVNPPIYGLNLTAVRQEVIRLFYKSRQ----- : 315
OR126-5 : QSLRNFMALEFLLPPIVNPPIYGLNLTAVRQEVIRLFYKSRQ----- : 315
OR126-4 : QSLRNFMALEFLLPPIVNPPIYGLKMTVROEINMFFRKTENI----- : 314
OR125-1 : ESLRHFALAELELVPPPLFNPPIYGLNLTAVRQEVIRLFYKSRQ----- : 319
OR125-2 : ESLRHFALAELELVPPPLFNPPIYGLNLTAVRQEVIRLFYKSRQ----- : 306
OR125-8 : ESLRHFALAELELVPPPLFNPPIYGLNLTAVRQEVIRLFYKSRQ----- : 341
OR125-3 : DDLRNFALAELELVPPPLFNPPIYGLNLTAVRQEVIRLFYKSRQ----- : 309
OR125-5 : ANLQFFLAELELVPPPLFNPPIYGLKLTAVRQEVIRLFYKSRQ----- : 308
OR125-6 : ANLQFFLAELELVPPPLFNPPIYGLKLTAVRQEVIRLFYKSRQ----- : 317
OR125-7 : VNLRFALAELELVPPPLFNPPIYGLKLTAVRQEVIRLFYKSRQ----- : 311
OR125-4 : DSFQNFALAELELVPPPLFNPPIYGLKLTAVRQEVIRLFYKSRQ----- : 307
OR128-13 : VGLSVFLSLEFLLPPIVNPPIYGLSLDTRKKNICLRNRCR----- : 305
OR128-7 : VGLSVFLSLEFLLPPIVNPPIYGLSLDTRKKNICLRNRCR----- : 305
OR128-9 : VGLSVFLSLEFLLPPIVNPPIYGLSLDTRKKNICLRNRCR----- : 305
OR128-8 : VGLSVFLSLEFLLPPIVNPPIYGLSLDTRKKNICLRNRCR----- : 310
OR128-6 : VGLSVFLSLEFLLPPIVNPPIYGLSLDTRKKNICLRNRCR----- : 305
OR128-10 : IGLSIIISLEFLLPPIVNPPIYGLNLTAVRQEVIRLFYKSRQ----- : 305
OR128-1 : VGLSVFLSLEFLLPPIVNPPIYAFNLPDRKKNISLIPKPF----- : 305
OR128-2 : VGLSVFLSLEFLLPPIVNPPIYAFNLPDRKKNISLIPKPF----- : 305
OR128-3 : VGLSVFLSLEFLLPPIVNPPIYAFNLPDRKKNISLIPKPF----- : 303
OR128-4 : VGLSVFLSLEFLLPPIVNPPIYAFNLPDRKKNISLIPKPF----- : 305
OR128-5 : VGLSVFLSLEFLLPPIVNPPIYAFNLPDRKKNISLIPKPF----- : 306
OR127-1 : I-LTIIFSVFVLPPIVNPPIYGLNLTAVRQEVIRLFYKSRQ----- : 314
OR122-2 : AVVRVILSYFLVCPPLINPTIYGVSLTNEKKAALKKICIG----- : 307
OR122-1 : AVVRVILSYFLVCPPLINPTIYGVSLTNEKKAALKKICIG----- : 307
OR121-1 : ALIRVIVSYFLMCPPLINPTIYGVSLTNEKKAALKKICIG----- : 312
OR120-1 : KEVNVFMSVHFILPPLINPTIYGIRTRKEIRKRIITDIFLYTQKITK----- : 329
OR115-14 : AETRKLAAITLHVTPPALNPTIYGVQSKERQKILKLFNRQINAK----- : 312
OR115-2 : AETRKLAAITLHVTPPALNPTIYGVQSKERQKILKLFNRQINAK----- : 312
OR115-13 : AETRKLAAITLHVTPPALNPTIYGVQSKERQKILKLFNRQINAK----- : 312
OR115-12 : TESRKFGNVMFHVPPGLNPTIYGLQAKERKDKMLKCVKKNVPS----- : 312
OR115-10 : SDSRKLSSIIKHIVPPCLNPTIYGLQAKERKDKMLKCVKKNVPS----- : 313
OR115-11 : YENRRIASIVFVPPGLNPTIYGLQAKERKDKMLKCVKKNVPS----- : 305
OR115-9 : AESRKLGSIMFHIVPPGLNPTIYGLQAKERKDKMLKCVKKNVPS----- : 314
OR115-7 : SDNRKLASIMFHIVPPGLNPTIYGLQAKERKDKMLKCVKKNVPS----- : 313
OR115-4P : SDNRKLASIMFHIVPPGLNPTIYGLQAKERKDKMLKCVKKNVPS----- : 317
OR115-1 : SDTRKLASIMFHIVPPGLNPTIYGLQAKERKDKMLKCVKKNVPS----- : 308

```

Figure S1

```

OR115-6 : SDSRKLASIMFHIVPPGLNPLVYGLQTKERQKTVKFCRSTKRLMSN----- : 315
OR115-8 : SENRKLASIMFHIAAPGLNPLVYGLQTKERQNTSKLCSRKNVNVK----- : 314
OR115-5 : SENRKLASIMFHIVPPGLNPLVYGLQTKERQIIVKRWKNAVDKL----- : 313
OR115-3P : SDNRKLASIMFHIVPPGLNPLVYGLQTKERQKMTNLWWRKX----- : 310
OR116-1 : ANLQKIMGMLIFLVPPIVNPVYGLNSHERKHILKTFHRKTSV----- : 311
OR116-2 : ADLQKIMGMLIFLVPPLVNPVYGLNSHERNNLLKVIHRKIAHM----- : 312
OR117-1 : PTAQRVCGLMIYAVLPPVNPVYGLKMKDIRIALFVVLRRKVVPGRKTDDVVKLRK----- : 326
OR118-1 : AFLRRVFSISNFIFFPIVNPVYGFKTKEIRLKVFNFSFKSKINSI----- : 312
OR118-2 : AYLRVFSITVVFVPIVNPVYGFKTKEIRQKMLTCFKRKMNTSL----- : 312
OR118-3 : AHLRRVFSISVVFVPIVNPVYGFKTKEIRQKIENFYKRKIIRVH----- : 313
OR119-1 : IHLRKFIAVAAMLPPPTVNPVYGLRTKEIRVKGKIFFHRKVFVS----- : 314
OR119-2 : IHLRKFIAVAAMLPPPTVNPVYGLRTKEIRVKGKIFFHRKVFVS----- : 314
OR132-5 : INLRYLNYLIVLILPRCLSPVYGLRDEAWWPLFKYFVFCYRSGKVKPVSINVH----- : 322
OR132-1 : INLRYLNYLIVLILPRCLSPVYGLRDEAWWPLFKYFVFCYRSGKIKPVSINVH----- : 323
OR132-2 : INLRYLNYFVWLILPRCLSPVYGLRDEAWWPLFKYFVFCYRSGSIKIPVSINVH----- : 322
OR132-3 : INLRYLNYFVWLILPRCLSPVYGLRDEAWWPLFKYFVFCYRSGKVKPFVNVH----- : 322
OR132-4 : INLRYLNFVWLILPRCNSPLVYGLRDEAWWPLFKYFVFCYRSGKVKPVSINVH----- : 322
OR133-1 : ISFMFFVFFVFMIFPRCLSPVYGLRDQAFSCLFKYFVFAFGLKPKSCNTEMLHGGGS----- : 320
OR133-2 : LHVMYFCFVFMIFPRCLSPVYGLRDQAFSCLFKYFVFAFGLKPKSCNTEIHLVGGG----- : 322
OR133-3 : MNVMYVGFVFLIFPRCLSPVYGLRDQAFSCLFIYFVFCYRSGKVKPVSINVH----- : 315
OR133-4 : INVMYFCFVFMIFPRCLSPVYGLRDQAFSCLFIYFVFCYRSGKVKPVSINVH----- : 317
OR133-6 : VNVMYFCFVFIIFPRCLSPVYGLRDQAFSCLFIYFVFCYRSGKVKPVSINVH----- : 317
OR133-5 : LHAIYVCFVFLIFPRCLSPVYGLRDQAFSCLFIYFVFCYRSGKVKPVSINVH----- : 321
OR133-7 : LNVMYFCFVFIIFPRCLSPVYGLRDQAFSCLFKYFVFAFGLKPKSCNTEMLHGGGS----- : 316
OR133-8 : VNVMYFCFVFIIFPRCLSPVYGLRDQAFSCLFKYFVFAFGLKPKSCNTEMLHGGGS----- : 316
OR133-9 : INVMYFCFVFIIFPRCLSPVYGLRDQAFSCLFKYFVFAFGLKPKSCNTEMLHGGGS----- : 318
OR137-7 : KKINFNLYLLTSLPRLLTPVYGLRDKQFFNHIKALLTCKLSAVNVDPKIQ----- : 309
OR137-1 : RRIRILNYLLTSLPRLLTPVYGLRDKQFFNHIKALLTCKLSAVNVDPKIQ----- : 310
OR137-2 : ARLTFNLNYLLTSLPRLLTPVYGLRDKHFNKHMKGLLSCLRHAVKVGSKVR----- : 314
OR137-3 : SKITFFNYLFTSLPRLLTPVYGLRDKHFNLKGLFLCRLPHVKVQPAKS----- : 310
OR137-8 : SKLLFCNYLLTSLPRLLTPVYGLRDKVYFVSHMKGIVACKLVIVKVESTKG----- : 310
OR137-4 : SKLLFCNYLLTSLPRLLTPVYGLRDKVYFVSHMKGIVACKLVIVKVESTKG----- : 310
OR137-5 : SILLFCNYLLTSLPRLLTPVYGLRDKVYFVSHMKGIVACKLVIVKVESTKG----- : 310
OR136-2P : TKITFFNYLITNIMPRLSPVYGLRDKQFVVKQKKEYFTCKVAVIKILPSKL----- : 308
OR136-1 : TKIATFCIYVFTNIMPRLSPVYGLRDKQFVVKQKKEYFTCKVAVIKILPSKL----- : 317
OR135-2 : LLIMFCSFVLTSLPRLLSPVYGLRDKQFVVKQKKEYFTCKVAVIKILPSKL----- : 310
OR135-1 : QIIYCTFLLTSLPRLLSPVYGLRDKQFVVKQKKEYFTCKVAVIKILPSKL----- : 306
OR140-1P : TTILFLLTSLPRLLSPVYGLRDKQFVVKQKKEYFTCKVAVIKILPSKL----- : 312
OR134-1 : LEIRFANYLIVYILPRFVSPVYGLRDKKFRKYLRRYFVCGVSTMETRVECKDGD----- : 315
OR129-1 : ADMSFLYYVCFNLPRFVSPVYGLRDKKFRKYLRRYFVCGVSTMETRVECKDGD----- : 315
OR131-1 : LNVRYSNFLLFVILPRFVSPVYGLRDKKFRKYLRRYFVCGVSTMETRVECKDGD----- : 321
OR131-2 : INVKFSNFMFLFVILPRFVSPVYGLRDKKFRKYLRRYFVCGVSTMETRVECKDGD----- : 326
OR130-1 : LTVRFINFLAFSITSRVSPVYGLRDKKFRKYLRRYFVCGVSTMETRVECKDGD----- : 315

```

Figure S1
