# Supplementary material for: The odorant receptor repertoire of teleost fish
Source: PubMed Central journal article supplement (PMC1325023; doi:10.1186/1471-2164-6-173), 2005-12-06
Supplement: 1471-2164-6-173-S3.pdf [file 1471-2164-6-173-S3.pdf]

|                     | TM3     |            |                  | TM4      |           |        | TM5     |         |          |         |        |      |         |      |          |
|---------------------|---------|------------|------------------|----------|-----------|--------|---------|---------|----------|---------|--------|------|---------|------|----------|
|                     | 120     | 130        | 140              | 150      | 160       | 170    | 180     | 190     | 200      | 210     | 220    |      |         |      |          |
| OR.scaffold_1026.1  | AOAFTS  | HMFGTTSHTI | LMIMAFDRYVAICN   | PLRYV    | TVIMSHRMV | IKLTVS | AWAVAFV | LVGLLGL | TIRINRCR | TLITNPY | CDNASL | FKLS | SDSVVIN | ---- | NIYGLMFT |
| OR.scaffold_8298.1  | AOAFTT  | HMFGTTSHTV | LMIMAFDRYVAICN   | PLRYAA   | IMNHRMV   | IKLTVS | AWAVAFV | LVGLLGL | TIRINRCR | TLITNPY | CDNASL | FKLS | SDSVVIN | ---- | NIYGLTFT |
| OR.scaffold_1026.2  | VOAFTT  | HMFGTTSHTV | LMIMAFDRYVAICN   | PLRYAA   | IMNHRMV   | IKLTVS | AWAVAFV | LVGLLGL | TIRINRCR | TLITNPY | CDNASL | FKLS | SDSVVIN | ---- | NIYGLTFT |
| OR.scaffold_4563.2  | VOAFTT  | HMFGTTSHTV | LMIMAFDRYVAICN   | PLRYAA   | IMNHRMV   | IKLTVS | AWAVAFV | LVGLLGL | TIRINRCR | TLITNPY | CDNASL | FKLS | SDSVVIN | ---- | NIYGLTFT |
| OR.scaffold_4563.1  | LOAFCN  | NYHASVSH   | TVLMIMAFDRYVAICN | PLRYSS   | IMNHRMV   | IKLTVS | AWAVAFV | LVGLLGL | TIRINRCR | TLITNPY | CDNASL | FKLS | SDSVVIN | ---- | NIYGLTFT |
| OR.scaffold_142.1   | FOAFTL  | HMVGGGLFL  | LAAMSFDRYVAICN   | PLRYNA   | IMNHRMV   | IKLTVS | AWAVAFV | LVGLLGL | TIRINRCR | TLITNPY | CDNASL | FKLS | SDSVVIN | ---- | NIYGLTFT |
| OR.scaffold_142.2   | --SV    | FLLA       | CLPG----         | LD       | PACP      | CF     | ED      | PA      | CL       | ----    | LL     | FV   | LQ      | MR   | LP       |
| OR.scaffold_142.3   | TOAFLI  | HMYGTGNLLI | LSIMAYDRYVAICN   | PLRYNE   | IMNHRMV   | IKLTVS | AWAVAFV | LVGLLGL | TIRINRCR | TLITNPY | CDNASL | FKLS | SDSVVIN | ---- | NIYGLTFT |
| OR.scaffold_142.5P  | TOAFLI  | HIYAGGTV   | FILAMAYDRYVAICN  | PLRYNT   | IMNHRMV   | IKLTVS | AWAVAFV | LVGLLGL | TIRINRCR | TLITNPY | CDNASL | FKLS | SDSVVIN | ---- | NIYGLTFT |
| OR.scaffold_3630.2  | FOAEMFY | SLGGSE     | FLAVMAYDRYVAICN  | PLRYSA   | IMNHRMV   | IKLTVS | AWAVAFV | LVGLLGL | TIRINRCR | TLITNPY | CDNASL | FKLS | SDSVVIN | ---- | NIYGLTFT |
| OR.scaffold_5510.1  | FOAEMFY | SLGGSE     | FLAVMAYDRYVAICN  | PLRYSA   | IMNHRMV   | IKLTVS | AWAVAFV | LVGLLGL | TIRINRCR | TLITNPY | CDNASL | FKLS | SDSVVIN | ---- | NIYGLTFT |
| OR.scaffold_8617.1  | FOAEMFY | SLGGSE     | FLAVMAYDRYVAICN  | PLRYSA   | IMNHRMV   | IKLTVS | AWAVAFV | LVGLLGL | TIRINRCR | TLITNPY | CDNASL | FKLS | SDSVVIN | ---- | NIYGLTFT |
| OR.scaffold_5887.1  | FOAEMFY | SLGGSE     | FLAVMAYDRYVAICN  | PLRYSA   | IMNHRMV   | IKLTVS | AWAVAFV | LVGLLGL | TIRINRCR | TLITNPY | CDNASL | FKLS | SDSVVIN | ---- | NIYGLTFT |
| OR.scaffold_4429.1  | FOAEMFY | SFGGSE     | FLAVMAYDRYVAICN  | PLRYSA   | IMNHRMV   | IKLTVS | AWAVAFV | LVGLLGL | TIRINRCR | TLITNPY | CDNASL | FKLS | SDSVVIN | ---- | NIYGLTFT |
| OR.scaffold_4429.2  | LOAFLY  | WLAGAE     | FLACMA           | DRYVAICN | PLRYH     | RMRNR  | TKLGS   | LLTS    | SLV      | PAC     | QAA    | MAAL | SSRL    | Q    | LCR      |
| OR.scaffold_7743.1  | TOAFLI  | NYAGS      | YCFALMAYDRYVAICN | PLRYH    | AVMR      | PVR    | VR      | LM      | VAL      | V       | LV     | LS   | ST      | AA   | Q        |
| OR.scaffold_117.1   | AOIYVI  | TYASYEL    | TLSIMAYDRYVAICN  | PLRYH    | HNK       | TKR    | SM      | RL      | LL       | SL      | Y      | PA   | F       | S    | V        |
| OR.scaffold_2346.5  | TOIYVF  | TYTYS      | FEMT             | LGI      | TAY       | DR     | H       | VA      | ICN      | PLRYH   | RMR    | N    | TK      | L    | G        |
| OR.scaffold_2346.4  | SOIYVI  | TYTAYE     | VTLSIMAYDRYVAICN | PLRYH    | SR        | K      | LP      | K       | V        | CA      | L      | S    | V       | F    | A        |
| OR.scaffold_2346.6  | VOI     | LVN        | SSV              | CAE      | V         | S      | F       | AL      | MAY      | DRY     | V      | A    | I       | C    | N        |
| OR.scaffold_3763.1  | VOI     | LVN        | SSV              | CAE      | V         | S      | F       | AL      | MAY      | DRY     | V      | A    | I       | C    | N        |
| OR.scaffold_3763.2  | VOI     | LVN        | SSV              | CAE      | V         | S      | F       | AL      | MAY      | DRY     | V      | A    | I       | C    | N        |
| OR.scaffold_4133.1  | VOI     | LVN        | SSV              | CAE      | V         | S      | F       | AL      | MAY      | DRY     | V      | A    | I       | C    | N        |
| OR.scaffold_6828.1  | VOI     | LVN        | SSV              | CAE      | V         | S      | F       | AL      | MAY      | DRY     | V      | A    | I       | C    | N        |
| OR.scaffold_6765.1  | VOI     | LVN        | SSV              | CAE      | V         | S      | F       | AL      | MAY      | DRY     | V      | A    | I       | C    | N        |
| OR.scaffold_123.1   | LOAFLV  | LHSS       | SAC              | AD       | F         | S      | I       | L       | MAY      | DRY     | V      | A    | I       | C    | N        |
| OR.scaffold_117.2   | LOGYVI  | HSS        | T                | CG       | D         | F      | S       | I       | L        | MAY     | DRY    | V    | A       | I    | C        |
| OR.scaffold_123.2   | LOAFLV  | MY         | PF               | AC       | C         | E      | M       | S       | I        | L       | MAY    | DRY  | V       | A    | I        |
| OR.scaffold_2346.2  | LOAFLV  | YI         | S                | Y        | A         | S      | T       | D       | F        | S       | I      | L    | MAY     | DRY  | V        |
| OR.scaffold_2346.3  | VOIYVI  | Y          | S                | N        | A         | K      | I       | D       | Y        | S       | I      | L    | MAY     | DRY  | V        |
| OR.scaffold_2346.4  | LOAFLV  | YI         | S                | Y        | A         | S      | T       | D       | F        | S       | I      | L    | MAY     | DRY  | V        |
| OR.scaffold_7149.1  | LOAFLV  | YI         | S                | Y        | A         | S      | T       | D       | F        | S       | I      | L    | MAY     | DRY  | V        |
| OR.scaffold_5511.2  | LOAFLV  | YI         | S                | Y        | A         | S      | T       | D       | F        | S       | I      | L    | MAY     | DRY  | V        |
| OR.scaffold_119.1   | TOAFLI  | HT         | Y                | A        | S         | L      | E       | F       | C        | S       | I      | L    | MAY     | DRY  | V        |
| OR.scaffold_5287.2  | TOAFLI  | HT         | Y                | A        | S         | L      | E       | F       | C        | S       | I      | L    | MAY     | DRY  | V        |
| OR.scaffold_142.6   | AOAEMF  | VH         | LG               | S        | V         | T      | S       | F       | I        | L       | MAY    | DRY  | V       | A    |          |
| OR.scaffold_142.7   | VOAEMF  | VH         | LG               | S        | V         | T      | S       | F       | I        | L       | MAY    | DRY  | V       | A    |          |
| OR.scaffold_3154.1P | TLF     | FL         | FL               | S        | L         | S      | M       | Q       | A        | L       | N      | V    | A       | I    |          |
| OR.scaffold_3905.1  | TFL     | F          | C                | Y        | T         | C      | L       | S       | M        | Q       | A      | L    | N       | V    |          |
| OR.scaffold_4479.1  | LOAFLV  | YI         | S                | Y        | A         | S      | T       | D       | F        | S       | I      | L    | MAY     | DRY  |          |
| OR.scaffold_4479.2  | LOAFLV  | YI         | S                | Y        | A         | S      | T       | D       | F        | S       | I      | L    | MAY     | DRY  |          |
| OR.scaffold_6269.1  | LOAFLV  | YI         | S                | Y        | A         | S      | T       | D       | F        | S       | I      | L    | MAY     | DRY  |          |
| OR.scaffold_4208.2  | VF      | L          | L                | A        | V         | I      | T       | T       | E        | N       | S      | P    | L       | N    |          |
| OR.scaffold_4208.3  | VF      | L          | L                | A        | V         | I      | T       | T       | E        | N       | S      | P    | L       | N    |          |
| OR.scaffold_4208.1  | VF      | L          | L                | A        | V         | I      | T       | T       | E        | N       | S      | P    | L       | N    |          |
| OR.scaffold_11306.1 | VF      | L          | L                | A        | V         | I      | T       | T       | E        | N       | S      | P    | L       | N    |          |
| OR.scaffold_59.1    | IVN     | V          | G                | V        | I         | T      | S       | D       | I        | S       | P      | L    | N       | S    |          |
| OR.scaffold_6030.1  | IL      | T          | A                | L        | G         | V      | L       | T       | S        | N       | I      | S    | P       | L    |          |
| OR.scaffold_144.1P  | IL      | L          | S                | V        | S         | V      | L       | T       | S        | D       | I      | S    | P       | L    |          |
| OR.scaffold_7573.1  | IL      | L          | S                | V        | S         | V      | L       | T       | S        | D       | I      | S    | P       | L    |          |
| OR.scaffold_6392.1  | IF      | Y          | L                | I        | A         | V      | S       | V       | C        | V       | P      | T    | A       | M    |          |
| OR.scaffold_7903.1  | VF      | Y          | L                | I        | V         | S      | L       | S       | V        | F       | V      | T    | P       | T    |          |
| OR.scaffold_26.3P   | VF      | Y          | L                | I        | V         | S      | L       | S       | V        | F       | V      | T    | P       | T    |          |
| OR.scaffold_6818.1  | TL      | Y          | V                | V        | L         | A      | L       | Y       | T        | F       | V      | T    | P       | T    |          |
| OR.scaffold_217.1   | SV      | L          | F                | A        | S         | L      | T       | T       | M        | S       | P      | L    | N       | A    |          |
| OR.scaffold_26.4    | PL      | L          | L                | S        | T         | T      | F       | Q       | N        | T       | P      | L    | I       | A    |          |

Figure S2

|                    | TM5  |         |      |         |       | TM6    |       |        |       | TM7     |        |          |         |         |        |       |        |       |        |       |        |        |      |      |       |       |     |      |     |    |      |   |   |   |   |   |   |   |   |   |   |   |   |   |   |   |   |   |   |   |   |   |   |   |   |   |   |   |   |   |   |   |   |   |   |   |   |   |   |   |   |   |   |   |   |   |   |   |   |   |   |   |   |   |   |   |   |   |   |   |   |   |     |
|--------------------|------|---------|------|---------|-------|--------|-------|--------|-------|---------|--------|----------|---------|---------|--------|-------|--------|-------|--------|-------|--------|--------|------|------|-------|-------|-----|------|-----|----|------|---|---|---|---|---|---|---|---|---|---|---|---|---|---|---|---|---|---|---|---|---|---|---|---|---|---|---|---|---|---|---|---|---|---|---|---|---|---|---|---|---|---|---|---|---|---|---|---|---|---|---|---|---|---|---|---|---|---|---|---|---|-----|
|                    | 230  | 240     | 250  | 260     | 270   | 280    | 290   | 300    | 310   | 320     | 330    |          |         |         |        |       |        |       |        |       |        |        |      |      |       |       |     |      |     |    |      |   |   |   |   |   |   |   |   |   |   |   |   |   |   |   |   |   |   |   |   |   |   |   |   |   |   |   |   |   |   |   |   |   |   |   |   |   |   |   |   |   |   |   |   |   |   |   |   |   |   |   |   |   |   |   |   |   |   |   |   |   |     |
| OR.scaffold_1026.1 | VVLF | FIASIGS | IVVY | YTKITIV | CVTSN | ---    | NKSVN | -SKALK | TCSTH | LLTYLLM | FCGMLA | LALHR    | FP--    | QYS-DYR | KICATL | FHII  | PGSN   | PIIY  | GVQSKE | IQKFL | LRHF   |        |      |      |       |       |     |      |     |    |      |   |   |   |   |   |   |   |   |   |   |   |   |   |   |   |   |   |   |   |   |   |   |   |   |   |   |   |   |   |   |   |   |   |   |   |   |   |   |   |   |   |   |   |   |   |   |   |   |   |   |   |   |   |   |   |   |   |   |   |   |   |     |
| OR.scaffold_8298.1 | VVLF | FIASIGS | IVVY | YTKITIV | CVTSN | ---    | NKSVN | -SKALK | TCSTH | LLMYLIM | FASGIL | VIALHR   | FP--    | QYS-DYR | KICATL | FHII  | PGSN   | PIIY  | GVQSKE | IQKFL | LRQF   |        |      |      |       |       |     |      |     |    |      |   |   |   |   |   |   |   |   |   |   |   |   |   |   |   |   |   |   |   |   |   |   |   |   |   |   |   |   |   |   |   |   |   |   |   |   |   |   |   |   |   |   |   |   |   |   |   |   |   |   |   |   |   |   |   |   |   |   |   |   |   |     |
| OR.scaffold_1026.2 | VVLF | FIASIGS | IVVY | YTKITIV | CVTSN | ---    | NKSVN | -SKALK | TCSTH | LLVYLM  | IASAGL | LIIALHR  | FP--    | QYS-DYR | KICATL | FHII  | PGSN   | PIIY  | GVQSKE | IQKYL | YKLF   |        |      |      |       |       |     |      |     |    |      |   |   |   |   |   |   |   |   |   |   |   |   |   |   |   |   |   |   |   |   |   |   |   |   |   |   |   |   |   |   |   |   |   |   |   |   |   |   |   |   |   |   |   |   |   |   |   |   |   |   |   |   |   |   |   |   |   |   |   |   |   |     |
| OR.scaffold_4563.1 | AVLL | GSSIGS  | IVLY | YTKITIV | CVTSN | ---    | NKSLN | -SKALK | TCSTH | LLVYVLL | TTGLS  | SNIALHR  | FP--    | QHR-HYR | LLCMIL | FHIV  | PGIIN  | PIIY  | GLQSKE | IRKVL | SKPL   |        |      |      |       |       |     |      |     |    |      |   |   |   |   |   |   |   |   |   |   |   |   |   |   |   |   |   |   |   |   |   |   |   |   |   |   |   |   |   |   |   |   |   |   |   |   |   |   |   |   |   |   |   |   |   |   |   |   |   |   |   |   |   |   |   |   |   |   |   |   |   |     |
| OR.scaffold_4563.1 | VVLL | GSSIGS  | IVLY | YTKITIV | CVTSN | ---    | NNVLN | -SRALQ | TCSTH | LLAVYLL | LLLSG  | SIITILHR | FP--    | QLS-DHR | KLVHLL | HVAP  | PAIN   | PIIY  | GLQIKR | VVRE  | KLILF  |        |      |      |       |       |     |      |     |    |      |   |   |   |   |   |   |   |   |   |   |   |   |   |   |   |   |   |   |   |   |   |   |   |   |   |   |   |   |   |   |   |   |   |   |   |   |   |   |   |   |   |   |   |   |   |   |   |   |   |   |   |   |   |   |   |   |   |   |   |   |   |     |
| OR.scaffold_142.1  | AVIQ | AVLSL   | VQAF | SYVH    | LIACM | VSR--- | RSEAK | -MKA   | INTC  | VQAO    | MLIA   | FEFVAT   | FITLSHR | FN--    | TVSAD  | LQKIM | GLIF   | LIFL  | PPLN   | PIIY  | GLYGTG | IRNALL | RII  |      |       |       |     |      |     |    |      |   |   |   |   |   |   |   |   |   |   |   |   |   |   |   |   |   |   |   |   |   |   |   |   |   |   |   |   |   |   |   |   |   |   |   |   |   |   |   |   |   |   |   |   |   |   |   |   |   |   |   |   |   |   |   |   |   |   |   |   |   |     |
| OR.scaffold_142.1  | AVIQ | AVLSL   | VQAF | SYVH    | LIACM | VSR--- | RSEAK | -MKA   | INTC  | VQAO    | MLIA   | FEFVAT   | FITLSHR | FN--    | TVSAD  | LQKIM | GLIF   | LIFL  | PPLN   | PIIY  | GLYGTG | IRNALL | RII  |      |       |       |     |      |     |    |      |   |   |   |   |   |   |   |   |   |   |   |   |   |   |   |   |   |   |   |   |   |   |   |   |   |   |   |   |   |   |   |   |   |   |   |   |   |   |   |   |   |   |   |   |   |   |   |   |   |   |   |   |   |   |   |   |   |   |   |   |   |     |
| OR.scaffold_142.3  | ILIQ | GVPLA   | IMMY | TYA     | QILY  | VCIM   | TN--- | NADAR  | -KQAT | QTCSS   | HVVY   | FLQV     | NTLV    | TLMA    | HRNG-- | KVSP  | TIRRAL | GVSL  | IFP    | PLLD  | PIIY   | GLR    | VQK  | LKMG | KMLL  |       |     |      |     |    |      |   |   |   |   |   |   |   |   |   |   |   |   |   |   |   |   |   |   |   |   |   |   |   |   |   |   |   |   |   |   |   |   |   |   |   |   |   |   |   |   |   |   |   |   |   |   |   |   |   |   |   |   |   |   |   |   |   |   |   |   |   |     |
| OR.scaffold_142.5P | ALTQ | VNV     | VMF  | ILY     | QILV  | ACFG   | SK--- | QPTDK  | -KHAL | QTCATH  | LIVFL  | LECL     | GLFT    | ITIS    | YRLK-- | DISP  | HLRKF  | QCMST | LIF    | PPTL  | PIIY   | GLR    | TKKE | TRDK | ----  |       |     |      |     |    |      |   |   |   |   |   |   |   |   |   |   |   |   |   |   |   |   |   |   |   |   |   |   |   |   |   |   |   |   |   |   |   |   |   |   |   |   |   |   |   |   |   |   |   |   |   |   |   |   |   |   |   |   |   |   |   |   |   |   |   |   |   |     |
| OR.scaffold_3630.2 | VNLL | VIV     | PMV  | FLS     | YAR   | ILL    | SYQSS | ---    | KEVRK | --      | KAAQ   | TCLPH    | MLIN    | FSC     | LTVY   | DVLL  | RLN    | -TV   | VPK    | VHF   | LIT    | QI     | IMY  | HFL  | EN    | PIIY  | GLK | MMKE | ISK | QL | KKLF |   |   |   |   |   |   |   |   |   |   |   |   |   |   |   |   |   |   |   |   |   |   |   |   |   |   |   |   |   |   |   |   |   |   |   |   |   |   |   |   |   |   |   |   |   |   |   |   |   |   |   |   |   |   |   |   |   |   |   |   |   |     |
| OR.scaffold_5510.1 | VNLL | VIV     | PMV  | FLS     | YAR   | ILL    | SYQSS | ---    | KEVRK | --      | KAAQ   | TCLPH    | MLIN    | FSC     | LTVY   | DVLL  | RLN    | -TV   | VPK    | VHF   | LIT    | QI     | IMY  | HFL  | EN    | PIIY  | GLK | MMKE | ISK | QL | KKLF |   |   |   |   |   |   |   |   |   |   |   |   |   |   |   |   |   |   |   |   |   |   |   |   |   |   |   |   |   |   |   |   |   |   |   |   |   |   |   |   |   |   |   |   |   |   |   |   |   |   |   |   |   |   |   |   |   |   |   |   |   |     |
| OR.scaffold_8617.1 | VNLL | VIV     | PMV  | FLS     | YAR   | ILL    | SYQSS | ---    | KEVRK | --      | KAAQ   | TCLPH    | MLIN    | FSC     | LTVY   | DVLL  | RLN    | -TV   | VPK    | VHF   | LIT    | QI     | IMY  | HFL  | EN    | PIIY  | GLK | MMKE | ISK | QL | KKLF |   |   |   |   |   |   |   |   |   |   |   |   |   |   |   |   |   |   |   |   |   |   |   |   |   |   |   |   |   |   |   |   |   |   |   |   |   |   |   |   |   |   |   |   |   |   |   |   |   |   |   |   |   |   |   |   |   |   |   |   |   |     |
| OR.scaffold_5887.1 | VNLL | VIV     | PMV  | FLS     | YAR   | ILL    | SYQSS | ---    | KEVRK | --      | KAAQ   | TCLPH    | MLIN    | FSC     | LTVY   | DVLL  | RLN    | -TV   | VPK    | VHF   | LIT    | QI     | IMY  | HFL  | EN    | PIIY  | GLK | MMKE | ISK | QL | KKLF |   |   |   |   |   |   |   |   |   |   |   |   |   |   |   |   |   |   |   |   |   |   |   |   |   |   |   |   |   |   |   |   |   |   |   |   |   |   |   |   |   |   |   |   |   |   |   |   |   |   |   |   |   |   |   |   |   |   |   |   |   |     |
| OR.scaffold_4429.1 | FHL  | VVLS    | LV   | FLS     | YIR   | ILL    | SYQSS | ---    | KEVRR | --      | KAAQ   | TCLPH    | MLIN    | FSC     | LSY    | DVIL  | KAK    | -I    | HVS    | R     | T      | Q      | L    | I    | M     | T     | F   | Q    | V   | I  | M    | H | E | L | N | P | I | Y | G | L | K | M | K | E | I | S | K | H | L | S | A | H | F |   |   |   |   |   |   |   |   |   |   |   |   |   |   |   |   |   |   |   |   |   |   |   |   |   |   |   |   |   |   |   |   |   |   |   |   |   |   |   |     |
| OR.scaffold_4429.2 | MVSG | IIP     | MF   | FLS     | YIR   | ILL    | SYQSS | ---    | KEVRR | --      | KAAQ   | TCLPH    | MLIN    | FSC     | LSY    | DVIL  | KAK    | -I    | HVS    | R     | T      | Q      | L    | I    | M     | T     | F   | Q    | V   | I  | M    | H | E | L | N | P | I | Y | G | L | K | M | K | E | I | S | K | H | L | S | A | H | F |   |   |   |   |   |   |   |   |   |   |   |   |   |   |   |   |   |   |   |   |   |   |   |   |   |   |   |   |   |   |   |   |   |   |   |   |   |   |   |     |
| OR.scaffold_7743.1 | ACV  | IAL     | P    | FLS     | YIR   | ILL    | SYQSS | ---    | KEVRR | --      | KAAQ   | TCLPH    | MLIN    | FSC     | LSY    | DVIL  | KAK    | -I    | HVS    | R     | T      | Q      | L    | I    | M     | T     | F   | Q    | V   | I  | M    | H | E | L | N | P | I | Y | G | L | K | M | K | E | I | S | K | H | L | S | A | H | F |   |   |   |   |   |   |   |   |   |   |   |   |   |   |   |   |   |   |   |   |   |   |   |   |   |   |   |   |   |   |   |   |   |   |   |   |   |   |   |     |
| OR.scaffold_117.1  | VTT  | VFL     | PLA  | FV      | LY    | T      | YGR   | I      | FF    | I       | CR     | KCS      | ---     | SDFKS   | --     | KV    | VH     | S     | O      | LP    | H      | I      | T    | F    | V     | N     | S   | V    | T   | V  | F    | C | D | V | A | L | S | R | I | D | L | E | S | N | P | F | I | A | V | V | L | S | L | E | F | V | I | P | P | L | V | N | P | I | Y | G | L | K | L | P | E | I | R | C | I | L | R | M | F |   |   |   |   |   |   |   |   |   |   |   |   |   |     |
| OR.scaffold_2346.5 | ILTI | I       | F    | P       | L     | L      | V     | L      | Y     | T       | I      | Q        | I       | V       | A      | T     | C      | W     | K      | S     | ---    | AGFNR  | --   | R    | V     | Q     | S   | V    | P   | H  | I    | S | F | V | I | N | S | T | V | F | C | D | I | A | L | S | R | N | I | E | E | T | N | P | L | A | V | I | F | S | L | E | F | V | I | P | P | L | V | N | P | I | Y | G | L | K | L | P | E | I | R | C | I | L | R | M | F |   |   |   |   |   |     |
| OR.scaffold_2346.4 | VLL  | M       | V    | F       | H     | G      | F     | F      | I     | L       | Y      | I        | H       | L       | A      | T     | C      | T     | K      | S     | ---    | LDVR   | --   | K    | F     | Q     | T   | C    | P   | H  | I    | S | F | V | I | N | S | T | V | F | C | D | I | A | L | S | R | N | I | E | E | T | N | P | L | A | V | I | F | S | L | E | F | V | I | P | P | L | V | N | P | I | Y | G | L | K | L | P | E | I | R | C | I | L | R | M | F |   |   |   |   |   |     |
| OR.scaffold_2346.6 | ITF  | Y       | F    | C       | H     | F      | L     | V      | I     | Y       | S      | F        | Y       | I       | M      | K     | T      | C     | L      | T     | C      | ---    | EERM | --   | K     | F     | Q   | T    | C   | P  | H    | I | S | F | V | I | N | S | T | V | F | C | D | I | A | L | S | R | N | I | E | E | T | N | P | L | A | V | I | F | S | L | E | F | V | I | P | P | L | V | N | P | I | Y | G | L | K | L | P | E | I | R | C | I | L | R | M | F |   |   |   |   |     |
| OR.scaffold_3763.1 | ITF  | Y       | F    | C       | H     | F      | L     | V      | I     | Y       | S      | F        | Y       | I       | M      | K     | T      | C     | L      | T     | C      | ---    | EERM | --   | K     | F     | Q   | T    | C   | P  | H    | I | S | F | V | I | N | S | T | V | F | C | D | I | A | L | S | R | N | I | E | E | T | N | P | L | A | V | I | F | S | L | E | F | V | I | P | P | L | V | N | P | I | Y | G | L | K | L | P | E | I | R | C | I | L | R | M | F |   |   |   |   |     |
| OR.scaffold_3763.2 | ITF  | Y       | F    | C       | H     | F      | L     | V      | I     | Y       | S      | F        | Y       | I       | M      | K     | T      | C     | L      | T     | C      | ---    | EERM | --   | K     | F     | Q   | T    | C   | P  | H    | I | S | F | V | I | N | S | T | V | F | C | D | I | A | L | S | R | N | I | E | E | T | N | P | L | A | V | I | F | S | L | E | F | V | I | P | P | L | V | N | P | I | Y | G | L | K | L | P | E | I | R | C | I | L | R | M | F |   |   |   |   |     |
| OR.scaffold_4133.1 | ITF  | Y       | F    | C       | H     | F      | L     | V      | I     | Y       | S      | F        | Y       | I       | M      | K     | T      | C     | L      | T     | C      | ---    | EERM | --   | K     | F     | Q   | T    | C   | P  | H    | I | S | F | V | I | N | S | T | V | F | C | D | I | A | L | S | R | N | I | E | E | T | N | P | L | A | V | I | F | S | L | E | F | V | I | P | P | L | V | N | P | I | Y | G | L | K | L | P | E | I | R | C | I | L | R | M | F |   |   |   |   |     |
| OR.scaffold_6828.1 | ITF  | Y       | F    | C       | H     | F      | L     | V      | I     | Y       | S      | F        | Y       | I       | M      | K     | T      | C     | L      | T     | C      | ---    | EERM | --   | K     | F     | Q   | T    | C   | P  | H    | I | S | F | V | I | N | S | T | V | F | C | D | I | A | L | S | R | N | I | E | E | T | N | P | L | A | V | I | F | S | L | E | F | V | I | P | P | L | V | N | P | I | Y | G | L | K | L | P | E | I | R | C | I | L | R | M | F |   |   |   |   |     |
| OR.scaffold_6765.1 | ITF  | Y       | F    | C       | H     | F      | L     | V      | I     | Y       | S      | F        | Y       | I       | M      | K     | T      | C     | L      | T     | C      | ---    | EDDR | --   | K     | F     | Q   | T    | C   | P  | H    | I | S | F | V | I | N | S | T | V | F | C | D | I | A | L | S | R | N | I | E | E | T | N | P | L | A | V | I | F | S | L | E | F | V | I | P | P | L | V | N | P | I | Y | G | L | K | L | P | E | I | R | C | I | L | R | M | F |   |   |   |   |     |
| OR.scaffold_123.1  | YI   | F       | Y    | F       | C     | H      | F     | S      | A     | V       | V      | Y        | V       | I       | Q      | K     | C      | L     | G      | S     | ---    | ESRT   | --   | K    | F     | Q     | T   | C    | P   | H  | I    | S | F | V | I | N | S | T | V | F | C | D | I | A | L | S | R | N | I | E | E | T | N | P | L | A | V | I | F | S | L | E | F | V | I | P | P | L | V | N | P | I | Y | G | L | K | L | P | E | I | R | C | I | L | R | M | F |   |   |   |   |   |     |
| OR.scaffold_117.2  | IL   | L       | Y    | F       | G     | H      | F     | F      | I     | I       | W      | S        | Y       | M       | I      | R     | S      | C     | L      | S     | S      | ---    | EDQH | --   | K     | F     | Q   | T    | C   | P  | H    | I | S | F | V | I | N | S | T | V | F | C | D | I | A | L | S | R | N | I | E | E | T | N | P | L | A | V | I | F | S | L | E | F | V | I | P | P | L | V | N | P | I | Y | G | L | K | L | P | E | I | R | C | I | L | R | M | F |   |   |   |   |     |
| OR.scaffold_123.2  | TL   | I       | Y    | F       | H     | G      | F     | F      | I     | I       | W      | S        | Y       | M       | I      | R     | S      | C     | L      | S     | S      | ---    | EDRV | --   | K     | F     | Q   | T    | C   | P  | H    | I | S | F | V | I | N | S | T | V | F | C | D | I | A | L | S | R | N | I | E | E | T | N | P | L | A | V | I | F | S | L | E | F | V | I | P | P | L | V | N | P | I | Y | G | L | K | L | P | E | I | R | C | I | L | R | M | F |   |   |   |   |     |
| OR.scaffold_2346.2 | IL   | F       | Y    | F       | C     | H      | D     | V      | F     | I       | M      | S        | Y       | V       | P      | L     | L      | S     | A      | V     | K      | S      | ---  | DGRK | --    | K     | F   | Q    | T   | C  | P    | H | I | S | F | V | I | N | S | T | V | F | C | D | I | A | L | S | R | N | I | E | E | T | N | P | L | A | V | I | F | S | L | E | F | V | I | P | P | L | V | N | P | I | Y | G | L | K | L | P | E | I | R | C | I | L | R | M | F |   |   |   |     |
| OR.scaffold_2346.3 | I    | V       | F    | Y       | F     | C      | H     | A      | L     | L       | S      | Y        | V       | Q       | L      | V     | K      | A     | T      | L     | K      | S      | ---  | EGRK | --    | K     | F   | Q    | T   | C  | P    | H | I | S | F | V | I | N | S | T | V | F | C | D | I | A | L | S | R | N | I | E | E | T | N | P | L | A | V | I | F | S | L | E | F | V | I | P | P | L | V | N | P | I | Y | G | L | K | L | P | E | I | R | C | I | L | R | M | F |   |   |   |     |
| OR.scaffold_2346.1 | M    | F       | H    | L       | L     | P      | L     | L      | T     | I       | Y      | I        | H       | L       | A      | T     | C      | T     | K      | S     | ---    | EDRV   | --   | K    | F     | Q     | T   | C    | P   | H  | I    | S | F | V | I | N | S | T | V | F | C | D | I | A | L | S | R | N | I | E | E | T | N | P | L | A | V | I | F | S | L | E | F | V | I | P | P | L | V | N | P | I | Y | G | L | K | L | P | E | I | R | C | I | L | R | M | F |   |   |   |   |   |     |
| OR.scaffold_7149.1 | F    | L       | T    | I       | V     | V      | P     | F      | L     | L       | S      | Y        | V       | K       | I      | L     | G      | V     | C      | L     | N      | A      | S    | ---  | KENTQ | --    | K   | A    | V   | S  | T    | C | P | O | I | V | S | L | S | N | M | F | L | G | T | L | H | F | H | S | E | R | I | D | A | A | V | P | D | K | L | R | I | I | L | S | I | Y | L | L | I | Q | M | I | T | P | P | I | Y | G | N | F | L | P | K | M | R | O | S | C | R | R | F   |
| OR.scaffold_5511.2 | F    | L       | T    | I       | V     | V      | P     | F      | L     | L       | S      | Y        | V       | K       | I      | L     | G      | V     | C      | L     | N      | A      | S    | ---  | KENTQ | --    | K   | A    | V   | S  | T    | C | P | O | I | V | S | L | S | N | M | F | L | G | T | L | H | F | H | S | E | R | I | D | A | A | V | P | D | K | L | R | I | I | L | S | I | Y | L | L | I | Q | M | I | T | P | P | I | Y | G | N | F | L | P | K | M | R | O | S | C | R | R | F   |
| OR.scaffold_119.1  | L    | V       | L    | I       | L     | P      | Q     | L      | L     | M       | I      | F        | S       | Y       | V      | I     | S      | Q     | V      | C     | R      | N      | L    | T    | ---   | RESQR | --  | R    | A   | L  | K    | T | O | V | P | H | E | S | L | N | Y | T | I | G | S | I | F | E | I | S | Q | T | R | F | S | M | H | M | V | A | E | A | R | I | F | M | S | L | Y | E | V | I | L | P | S | I | S | N | P | I | Y | G | L | T | Q | L | I | R | V | N | L | K | L</ |

|                     | 340                                                                                 | 350 | 360 | 370 | 380 | 390 | 400 | 410 |
|---------------------|-------------------------------------------------------------------------------------|-----|-----|-----|-----|-----|-----|-----|
| OR.scaffold_1026.1  | FHQKVLQSK                                                                           |     |     |     |     |     |     |     |
| OR.scaffold_8298.1  | FHQKVFVAVKINYLVAPLVH                                                                |     |     |     |     |     |     |     |
| OR.scaffold_1026.2  | QARKIMSSY                                                                           |     |     |     |     |     |     |     |
| OR.scaffold_4563.2  | MHMKSLSFS                                                                           |     |     |     |     |     |     |     |
| OR.scaffold_4563.1  | TRNSKTASIIQH                                                                        |     |     |     |     |     |     |     |
| OR.scaffold_142.1   | KKRSISV                                                                             |     |     |     |     |     |     |     |
| OR.scaffold_142.2   | KKRSISV                                                                             |     |     |     |     |     |     |     |
| OR.scaffold_142.3   | KRNVFLK                                                                             |     |     |     |     |     |     |     |
| OR.scaffold_142.5P  |                                                                                     |     |     |     |     |     |     |     |
| OR.scaffold_3630.2  | GKKGLF                                                                              |     |     |     |     |     |     |     |
| OR.scaffold_5510.1  | GKKRFVLTTCVYTLHHK                                                                   |     |     |     |     |     |     |     |
| OR.scaffold_8617.1  | GKKGLF                                                                              |     |     |     |     |     |     |     |
| OR.scaffold_5887.1  | GKKRFVLTTCVYILHHK                                                                   |     |     |     |     |     |     |     |
| OR.scaffold_4429.1  | HLEPQLNASV                                                                          |     |     |     |     |     |     |     |
| OR.scaffold_4429.2  | C                                                                                   |     |     |     |     |     |     |     |
| OR.scaffold_7743.1  | QRILQQP                                                                             |     |     |     |     |     |     |     |
| OR.scaffold_117.1   | HNPK                                                                                |     |     |     |     |     |     |     |
| OR.scaffold_2346.5  | TRHNII                                                                              |     |     |     |     |     |     |     |
| OR.scaffold_2346.4  | RLKH                                                                                |     |     |     |     |     |     |     |
| OR.scaffold_2346.6  | CRKS                                                                                |     |     |     |     |     |     |     |
| OR.scaffold_3763.1  | CRKR                                                                                |     |     |     |     |     |     |     |
| OR.scaffold_3763.2  | CRKSM                                                                               |     |     |     |     |     |     |     |
| OR.scaffold_4133.1  | CMKSL                                                                               |     |     |     |     |     |     |     |
| OR.scaffold_6828.1  | CRKS                                                                                |     |     |     |     |     |     |     |
| OR.scaffold_6765.1  | GKEI                                                                                |     |     |     |     |     |     |     |
| OR.scaffold_123.1   | WTKHVCI                                                                             |     |     |     |     |     |     |     |
| OR.scaffold_117.2   | HMKRKVALQSKK                                                                        |     |     |     |     |     |     |     |
| OR.scaffold_123.2   | SRK                                                                                 |     |     |     |     |     |     |     |
| OR.scaffold_2346.2  | KGKG                                                                                |     |     |     |     |     |     |     |
| OR.scaffold_2346.3  | CR                                                                                  |     |     |     |     |     |     |     |
| OR.scaffold_5287.1  | SHKAEH                                                                              |     |     |     |     |     |     |     |
| OR.scaffold_2346.1  | LGHKINIFM                                                                           |     |     |     |     |     |     |     |
| OR.scaffold_7149.1  | LGHKINIFM                                                                           |     |     |     |     |     |     |     |
| OR.scaffold_5511.2  | S                                                                                   |     |     |     |     |     |     |     |
| OR.scaffold_119.1   | MRHKIPLTKLSKTVRQS                                                                   |     |     |     |     |     |     |     |
| OR.scaffold_5287.2  | KLQVKKLIKVSPV                                                                       |     |     |     |     |     |     |     |
| OR.scaffold_142.6   | RNTGFGMKVNIYS                                                                       |     |     |     |     |     |     |     |
| OR.scaffold_142.7   | FSRISTNLKPG                                                                         |     |     |     |     |     |     |     |
| OR.scaffold_3154.1P | KFRVQTKIV-RKL                                                                       |     |     |     |     |     |     |     |
| OR.scaffold_3905.1  | KLGRKSKTTPRKLPNLPQTAACKC                                                            |     |     |     |     |     |     |     |
| OR.scaffold_4479.1  | RKNKIKVIKF                                                                          |     |     |     |     |     |     |     |
| OR.scaffold_4479.2  | RKNKIKVMKF                                                                          |     |     |     |     |     |     |     |
| OR.scaffold_6269.1  | RKSKIKGTFK                                                                          |     |     |     |     |     |     |     |
| OR.scaffold_4208.2  | LARSS                                                                               |     |     |     |     |     |     |     |
| OR.scaffold_4208.3  | LCRPPRAPEEPAQT                                                                      |     |     |     |     |     |     |     |
| OR.scaffold_4208.1  | LCKMGLGGH                                                                           |     |     |     |     |     |     |     |
| OR.scaffold_11306.1 | QIRRCGVPRPEVAPVNTL                                                                  |     |     |     |     |     |     |     |
| OR.scaffold_59.1    | CCRLTLSVFPKAGYK                                                                     |     |     |     |     |     |     |     |
| OR.scaffold_6030.1  | CCRLTLSVFPKAGYK                                                                     |     |     |     |     |     |     |     |
| OR.scaffold_144.1P  | CCQLKLSVFLKATNRPFLQTLICMYFYICLLQCFCGDINPLINENKWSITDIPMRPTEFSSHNEIVFGFYFV            |     |     |     |     |     |     |     |
| OR.scaffold_7573.1  | CCRLNYQSFRVKATNRPFLQTLIYMYHTCFRLRCLCGVRELVAAVAYFCLSYPEISFVTRGNI FPFSEIKQTVMLCLSQGGQ |     |     |     |     |     |     |     |
| OR.scaffold_6392.1  | LCGLYKKKIGFT                                                                        |     |     |     |     |     |     |     |
| OR.scaffold_7903.1  | LCGLYKKKIDYX                                                                        |     |     |     |     |     |     |     |
| OR.scaffold_26.3P   | LXXXXXXXXXXXXXXXXDFLPLSLICVRATFX                                                    |     |     |     |     |     |     |     |
| OR.scaffold_6818.1  | LCGLYKKRLDLFDE                                                                      |     |     |     |     |     |     |     |
| OR.scaffold_217.1   | PFRTAAARTFASS                                                                       |     |     |     |     |     |     |     |
| OR.scaffold_26.4    | LCCSNRGRPCVRRKQCDRVFAF                                                              |     |     |     |     |     |     |     |

Figure S2
