# Supplementary material for: The odorant receptor repertoire of teleost fish
Source: PubMed Central journal article supplement (PMC1325023; doi:10.1186/1471-2164-6-173), 2005-12-06
Supplement: 1471-2164-6-173-S4.pdf [file 1471-2164-6-173-S4.pdf]

|                 | TM3                            | TM4                | TM5                               |
|-----------------|--------------------------------|--------------------|-----------------------------------|
|                 | 120                            | 130                | 140                               |
|                 | 150                            | 160                | 170                               |
|                 | 180                            | 190                | 200                               |
|                 | 210                            | 220                |                                   |
| OR.SCAF12348.1  | QAFVHVSFACCEMSILAVMAYDRYVAIC   | PLRHSIMTRRR-LAAVGS | SLLAQCPVVSFLGIFVSTL               |
| OR.SCAF7360.1P  | QAFVMYSFACCEMSILAVMAYDRYVAIC   | PLRHSIMTRRR-LAAVGS | SLLAHACTFTFPXVYLXPPRXKLCG-SKLQKLF |
| OR.SCAF11981.1  | QAFVMYSFACCEMSILAVMAYDRYVAIC   | PLRHSIMTRRR-LAAVGS | SLLVFFISLGVSTSTLQKCG-SKLQKLF      |
| OR.SCAF8981.2   | QSLVVTSSCTCNDFDFVIMYDRYVAIC    | PLRHSIMTQR-VSVVFAA | WFVVPVQMLVLIISTSTLRLCG-SKISRVY    |
| OR.SCAF8981.3   | QSLVVTSSCTCNDFDFVIMYDRYVAIC    | PLRHSIMTQR-VSVVFAA | WFVVPVQMLVLIISTSTLRLCG-SKISRVY    |
| OR.SCAF13663.2P | QSLVHVSYCADFTLIVLMAYDRYVAIXR   | PLRHSIMTQR-VSVVFAA | WFVVPVQMLVLIISTSTLRLCG-SKISRVY    |
| OR.SCAF7360.2P  | QSYVLLSSICAEFSLIVLMAYDRYVAIC   | PLRHSIMTQR-VSVVFAA | WFVVPVQMLVLIISTSTLRLCG-SKISRVY    |
| OR.SCAF14677.3  | QLFGIYCYVCFEFTSLVMAYDRYVAIC    | PLRHSIMTQR-VSVVFAA | WFVVPVQMLVLIISTSTLRLCG-SKISRVY    |
| OR.SCAF12097.1  | QIYVFTYYSFEMTLGIYDRHVAIC       | PLRHSIMTQR-VSVVFAA | WFVVPVQMLVLIISTSTLRLCG-SKISRVY    |
| OR.SCAF12097.2  | QIYVFTYYSFEMTLGIYDRHVAIC       | PLRHSIMTQR-VSVVFAA | WFVVPVQMLVLIISTSTLRLCG-SKISRVY    |
| OR.SCAF12097.4P | QIYVFTYYSFEMTLGIYDRHVAIC       | PLRHSIMTQR-VSVVFAA | WFVVPVQMLVLIISTSTLRLCG-SKISRVY    |
| OR.SCAF14321.1  | QIYVFTYYSFELSLIVMAYDRYVAIC     | PLRHSIMTQR-VSVVFAA | WFVVPVQMLVLIISTSTLRLCG-SKISRVY    |
| OR.SCAF14370.1  | QIYVFTYYSFELSLIVMAYDRYVAIC     | PLRHSIMTQR-VSVVFAA | WFVVPVQMLVLIISTSTLRLCG-SKISRVY    |
| OR.SCAF14328.1  | QIYVFTYYSFELSLIVMAYDRYVAIC     | PLRHSIMTQR-VSVVFAA | WFVVPVQMLVLIISTSTLRLCG-SKISRVY    |
| OR.SCAF14339.1  | QIYVFTYYSFELSLIVMAYDRYVAIC     | PLRHSIMTQR-VSVVFAA | WFVVPVQMLVLIISTSTLRLCG-SKISRVY    |
| OR.SCAF14339.2  | QIYVFTYYSFELSLIVMAYDRYVAIC     | PLRHSIMTQR-VSVVFAA | WFVVPVQMLVLIISTSTLRLCG-SKISRVY    |
| OR.SCAF14534.1P | QIYVFTYYSFELSLIVMAYDRYVAIC     | PLRHSIMTQR-VSVVFAA | WFVVPVQMLVLIISTSTLRLCG-SKISRVY    |
| OR.SCAF14328.2  | QIYVFTYYSFELSLIVMAYDRYVAIC     | PLRHSIMTQR-VSVVFAA | WFVVPVQMLVLIISTSTLRLCG-SKISRVY    |
| OR.SCAF14703.1  | QVYVLSYASLEFSLIVMAYDRYVAIC     | PLRHSIMTQR-VSVVFAA | WFVVPVQMLVLIISTSTLRLCG-SKISRVY    |
| OR.SCAF14677.2  | QIFCVYTYVNVFECTLAVMAYDRYVAIC   | PLRHSIMTQR-VSVVFAA | WFVVPVQMLVLIISTSTLRLCG-SKISRVY    |
| OR.SCAF3073.1   | QIFCVYTYVNVFECTLAVMAYDRYVAIC   | PLRHSIMTQR-VSVVFAA | WFVVPVQMLVLIISTSTLRLCG-SKISRVY    |
| OR.SCAF14677.4P | QIFCLYSYAQVQFCSLAVMAYDRYVAIC   | PLRHSIMTQR-VSVVFAA | WFVVPVQMLVLIISTSTLRLCG-SKISRVY    |
| OR.SCAF14677.6  | QIFCLYSYAHVQFCSLAVMAYDRYVAIC   | PLRHSIMTQR-VSVVFAA | WFVVPVQMLVLIISTSTLRLCG-SKISRVY    |
| OR.SCAF14677.5P | QIFCVHSYGGVEFMTLAVMAYDRYVAIC   | PLRHSIMTQR-VSVVFAA | WFVVPVQMLVLIISTSTLRLCG-SKISRVY    |
| OR.SCAF14677.7  | QIFCVHSYGGVEFMTLAVMAYDRYVAIC   | PLRHSIMTQR-VSVVFAA | WFVVPVQMLVLIISTSTLRLCG-SKISRVY    |
| OR.SCAF8332.1   | QMSYIYTSASVEFCSLAVMAYDRYVAIC   | PLRHSIMTQR-VSVVFAA | WFVVPVQMLVLIISTSTLRLCG-SKISRVY    |
| OR.SCAF15134.2  | QCFAFYSLAGSEFLILAVMAYDRYVAIC   | PLRHSIMTQR-VSVVFAA | WFVVPVQMLVLIISTSTLRLCG-SKISRVY    |
| OR.SCAF15134.3  | QCFAFYSLAGSEFLILAVMAYDRYVAIC   | PLRHSIMTQR-VSVVFAA | WFVVPVQMLVLIISTSTLRLCG-SKISRVY    |
| OR.SCAF15134.1  | QYFAFYSLAGSEFLILAVMAYDRYVAIC   | PLRHSIMTQR-VSVVFAA | WFVVPVQMLVLIISTSTLRLCG-SKISRVY    |
| OR.SCAF14677.1  | QVFFTNVYSGSMFCLILAVMAYDRYVAIC  | PLRHSIMTQR-VSVVFAA | WFVVPVQMLVLIISTSTLRLCG-SKISRVY    |
| OR.SCAF11408.5  | QAFITQYGTSHHTVLMIMAFDRYVAIC    | PLRHSIMTQR-VSVVFAA | WFVVPVQMLVLIISTSTLRLCG-SKISRVY    |
| OR.SCAF11408.3  | QAFITQYGTSHHTVLMIMAFDRYVAIC    | PLRHSIMTQR-VSVVFAA | WFVVPVQMLVLIISTSTLRLCG-SKISRVY    |
| OR.SCAF15002.3P | QAFITQYGTSHHTVLMIMAFDRYVAIC    | PLRHSIMTQR-VSVVFAA | WFVVPVQMLVLIISTSTLRLCG-SKISRVY    |
| OR.SCAF15002.4  | QAFITQYGTSHHTVLMIMAFDRYVAIC    | PLRHSIMTQR-VSVVFAA | WFVVPVQMLVLIISTSTLRLCG-SKISRVY    |
| OR.SCAF15002.2P | QAYLLHVVYGTGNLMLVLSVMAYDRYVAIC | PLRHSIMTQR-VSVVFAA | WFVVPVQMLVLIISTSTLRLCG-SKISRVY    |
| OR.SCAF15002.1  | QAYLLHVVYGTGNLMLVLSVMAYDRYVAIC | PLRHSIMTQR-VSVVFAA | WFVVPVQMLVLIISTSTLRLCG-SKISRVY    |
| OR.SCAF14601.1  | QAFITQYGTSHHTVLMIMAFDRYVAIC    | PLRHSIMTQR-VSVVFAA | WFVVPVQMLVLIISTSTLRLCG-SKISRVY    |
| OR.SCAF15001.1  | QMFYYSFATLESALALAYDRYVAIC      | PLRHSIMTQR-VSVVFAA | WFVVPVQMLVLIISTSTLRLCG-SKISRVY    |
| OR.SCAF15002.5  | QMFYYSFATLESALALAYDRYVAIC      | PLRHSIMTQR-VSVVFAA | WFVVPVQMLVLIISTSTLRLCG-SKISRVY    |
| OR.SCAF15002.6  | QMFYYSFATLESALALAYDRYVAIC      | PLRHSIMTQR-VSVVFAA | WFVVPVQMLVLIISTSTLRLCG-SKISRVY    |
| OR.SCAF14677.8  | QMFYYSFATLESALALAYDRYVAIC      | PLRHSIMTQR-VSVVFAA | WFVVPVQMLVLIISTSTLRLCG-SKISRVY    |
| OR.SCAF10960.3  | LLLPAIITENTPLNLAAMALECYVAVCP   | PLRHSIMTQR-VSVVFAA | WFVVPVQMLVLIISTSTLRLCG-SKISRVY    |
| OR.SCAF10960.2  | FILLALFTTENTPLNLAAMALECYVAVCP  | PLRHSIMTQR-VSVVFAA | WFVVPVQMLVLIISTSTLRLCG-SKISRVY    |
| OR.SCAF10960.6  | FILLAVFTTRNTPLNLAAMALECYVAVCP  | PLRHSIMTQR-VSVVFAA | WFVVPVQMLVLIISTSTLRLCG-SKISRVY    |
| OR.SCAF10960.5  | ALLATMLTTQNTPLNLAAMALECYVAVCP  | PLRHSIMTQR-VSVVFAA | WFVVPVQMLVLIISTSTLRLCG-SKISRVY    |
| OR.SCAF10960.4  | LNVGAVLTTSDISPLTIVMMSLERYVAVCP | PLRHSIMTQR-VSVVFAA | WFVVPVQMLVLIISTSTLRLCG-SKISRVY    |
| OR.SCAF14536.1  | LNVGAVLTTSDISPLTIVMMSLERYVAVCP | PLRHSIMTQR-VSVVFAA | WFVVPVQMLVLIISTSTLRLCG-SKISRVY    |
| OR.SCAF14536.4  | LNVGAVLTTSDISPLTIVMMSLERYVAVCP | PLRHSIMTQR-VSVVFAA | WFVVPVQMLVLIISTSTLRLCG-SKISRVY    |
| OR.SCAF14536.2  | LNVGAVLTTSDISPLTIVMMSLERYVAVCP | PLRHSIMTQR-VSVVFAA | WFVVPVQMLVLIISTSTLRLCG-SKISRVY    |
| OR.SCAF14536.3  | LNVGAVLTTSDISPLTIVMMSLERYVAVCP | PLRHSIMTQR-VSVVFAA | WFVVPVQMLVLIISTSTLRLCG-SKISRVY    |
| OR.SCAF11324.1  | LNVGAVLTTSDISPLTIVMMSLERYVAVCP | PLRHSIMTQR-VSVVFAA | WFVVPVQMLVLIISTSTLRLCG-SKISRVY    |
| OR.SCAF14536.5P | LNVGAVLTTSDISPLTIVMMSLERYVAVCP | PLRHSIMTQR-VSVVFAA | WFVVPVQMLVLIISTSTLRLCG-SKISRVY    |
| OR.SCAF14825.1  | LNVGAVLTTSDISPLTIVMMSLERYVAVCP | PLRHSIMTQR-VSVVFAA | WFVVPVQMLVLIISTSTLRLCG-SKISRVY    |
| OR.SCAF14448.1  | LLFLSTTTFQNTPLIATMSLERYVAIFY   | PLRHSIMTQR-VSVVFAA | WFVVPVQMLVLIISTSTLRLCG-SKISRVY    |
| OR.SCAF14955.1  | LLFLSTTTFQNTPLIATMSLERYVAIFY   | PLRHSIMTQR-VSVVFAA | WFVVPVQMLVLIISTSTLRLCG-SKISRVY    |
| OR.SCAF12434.1  | CYLIVLFCGFIPTVITAMTLERYVAIC    | PLRHSIMTQR-VSVVFAA | WFVVPVQMLVLIISTSTLRLCG-SKISRVY    |

Figure S3

TM5
TM6
TM7
↓

230
240
250
260
270
280
290
300
310
320
330

OR.SCAF12348.1 YVLHGFFI IWTYVHLAITCTN-SKE--D-RVKFICQTCI PHLVSLIVFLFV-IVFDLMFMRFG---SKTL PQSLMNLIGIKFVIFPFLVNPFIYGFKLOKIRHRIRAGYVSR  
OR.SCAF7360.1P YVLHGFFI VWTYVHLAITCTN-SKE--D-RVKFICQTCI PHLVSLIVFIFV-VMFDMVFMRFG---SKTL PQSLMNLIGIKFVIFPFLVNPFIYGFKLOKIRHRVAGYV--  
OR.SCAF11981.1 YVLHGFFI VWTYVHLAITCTN-SKE--D-RVKFICQTCI PHLVSLIIFLFLV-IVFDLMFMRFG---SKTL PQSLMNLIGIKFVIFPFLVNPFIYGFKLOKIRGKIAGFVFRK  
OR.SCAF8981.2 YLCLFLLVIVSYFHMKTCLT-SKD--D-RIKFLQCLPHLMSFIVVSMC-LFFDILHEGFS---SERIPESARNFIAIQFLVLPFLINPLIYGLKLNKVRNRINRFMCR  
OR.SCAF8981.3 YFCFVLLVIVSYFHMKTCLS-SKD--D-RIKFLQCLPHLMSFIVVSMC-LFFDMLYEKLS---TEKIPKSTQNFIAIEFLFFPELINPLIYGLKLNKVRNRIEKFLCR  
OR.SCAF13663.2P YFCLFLLVIVSYFHMKTCLT-SKE--D-RIKFLQCLPHLMSLIVVATC-LFFDVLVYQLS---SERIPESAQNFAIQFLVLPFLINPLIYGVKLSKVRNRIEVFLFR  
OR.SCAF7360.2P NVRQFIVVIVSYVHLIRKQLV-SQK--S-RAKEMQCLPHALCLITVATY-LFFDMLVYQFLS---STQLPQIFONFIAIQFLVLPVIVNPLIYGFNLKQIRKRIQVQLFC  
OR.SCAF14677.3 HLSQTTLLIVSYTHLVRASMK-LRS--N-RRKFMQTCVPHLALVFTTES-LFFDIMYRYGGSSSSSTLAVLQNALAAEFVLPVPEIINPIYGINLHQIRTKILOHLRP  
OR.SCAF12097.1 IFFPFLVLYTYVQIVAVCWKGAEE--F-RRKVFQNCPLPHVVSFLVNSLT-IVCDVAFSRYN---IEEINPFLAVILSLSEFVILIPVLPVNPVYGLKLPQIRREIFRLFAK  
OR.SCAF12097.2 IFFPFLVLYTYVQIVAVCWKGAEE--F-RRKVFQNCPLPHVVSFLVNSLT-IVCDVAFSRYN---IEEINPFLAVILSLSEFVILIPVLPVNPVYGLKLPQIRREIFRLFAK  
OR.SCAF12097.4P IFFPFLVLYTYVQIVAAKCRKGAEE--F-RRKVFQNCPLPHVVSFLVNSLT-IVCDVAFSRYN---IEEINPFLAVILSLSEFVILIPVLPVNPVYGLKLPQIRREIVLRFK  
OR.SCAF14321.1 VFLPFVFLVLYTYGRIFLIQRKRSTSD--F-KRKVVQVQSCPLHIITFVNYSIN-VFCDVALSRID---LESLNPHYIAVILSLSEFVIVPELVNPLVYGLKLPQIRKCIIRMFQ  
OR.SCAF14370.1 VFLPFVFLVLYTYGRIFLIQRKRSTSD--F-KRKVVQVQSCPLHIITFVNYSIN-VFCDVALSRID---LESLNPHYIAVILSLSEFVIVPELVNPLVYGLKLPQIRKCIIRMFQ  
OR.SCAF14328.1 IFLPFLVLYTYGRIFLIQRKRSTSD--F-KRKVVQVQSCPLHIITFVNYSIN-VFCDVALSRID---LESLNPHYIAVILSLSEFVIVPELVNPLVYGLKLPQIRKCIIRMFQ  
OR.SCAF14339.1 IFLPFLVLYTYGRIFLIQRKRSTSD--F-KRKVVQVQSCPLHIITFVNYSIN-VFCDVALSRID---LESLNPHYIAVILSLSEFVIVPELVNPLVYGLKLPQIRKCIIRMFQ  
OR.SCAF14339.2 VFLPFVFLVLYTYGRIFLIQRKRSTSD--F-KRKVVQVQSCPLHIITFVNYSIN-VFCDVALSRID---LESLNPHYIAVILSLSEFVIVPELVNPLVYGLKLPQIRKCIIRMFQ  
OR.SCAF14332.1 IFLPFLVLYTYGRIFLIQRKRSTSD--F-KRKVVQVQSCPLHIITFVNYSIN-VFCDVALSRID---LESLNPHYIAVILSLSEFVIVPELVNPLVYGLKLPQIRKCIIRMFQ  
OR.SCAF14328.2 AFPLPFLVLYTYGRIFLIQRKRSTSD--F-KRKVVQVQSCPLHIITFVNYSIN-VFCDVALSRID---LESLNPHYIAVILSLSEFVIVPELVNPLVYGLKLPQIRKCIIRMFQ  
OR.SCAF14703.1 IIPQLMLVLFVSYVQSRVCRKLPKE--S-RCNALKTCI PHLLSLMIYITIG-SIFETIQTRFN---MNHVVAEARIFMSLFFVILPFLVNPVYGLTQIRVYLLKRLMG  
OR.SCAF14677.2 VLVPLVPLVILFVSYLRLLQVCFSGSRQ--T-ROKAVSTCSPHLVSLNLFALT-CLLEIVQTRLS---LAGLPRMLRNVLVSLYFLLIQELMTFVMHGLQVSAIRSRCKAVLWP  
OR.SCAF3073.1 VLVPLVPLVILFVSYLRLLQVCFSGSRQ--T-ROKAVSTCSPHLVSLNLFALT-CLLEIVQTRLS---LAGLPRMLRNVLVSLYFLLIQELMTFVMHGLQVSAIRSRCKAVLWP  
OR.SCAF14677.4P VLVPLVPLVILFVSYLRLLQVCFSGSRQ--T-ROKAVSTCSPHLVSLNLFALT-CLLEIVQTRLS---LAGLPRMLRNVLVSLYFLLIQELMTFVMHGLQVSAIRSRCKAVLWP  
OR.SCAF14677.6 VLVPLVPLVILFVSYLRLLQVCFSGSRQ--T-ROKAVSTCSPHLVSLNLFALT-CLLEIVQTRLS---LAGLPRMLRNVLVSLYFLLIQELMTFVMHGLQVSAIRSRCKAVLWP  
OR.SCAF14677.5P VVGCLLVIGYSYLRLLQVCFSGSRQ--T-ROKAVSTCSPHLVSLNLFALT-CLLEIVQTRLS---LAGLPRMLRNVLVSLYFLLIQELMTFVMHGLQVSAIRSRCKAVLWP  
OR.SCAF14677.7 VVGCLLVIGYSYLRLLQVCFSGSRQ--T-ROKAVSTCSPHLVSLNLFALT-CLLEIVQTRLS---LAGLPRMLRNVLVSLYFLLIQELMTFVMHGLQVSAIRSRCKAVLWP  
OR.SCAF8332.1 VIVPFSLLVLSYKLLAVCLKASKE--N-ROKAVSTVTPQIVSVSNLFGV-CTFHLESRTD---VTFPLVNIIVIFFSYVLLIFQEMINPFMYGFSLPKTKQSFKRLMFR  
OR.SCAF15134.2 VILPVVFILESYIRILLVSYQSSRE--V-RRKAAQCLPHLILINFSF-TIYDVLLIRLS---TTVPKTVRFLITLQIMMYQELFNPIIYGLKMRBISKHLKLFAR  
OR.SCAF15134.3 VILPVVFILESYIRILLVSYQSSRE--V-RRKAAQCLPHLILINFSF-TIYDVLLIRLS---TTVPKTVRFLITLQIMMYQELFNPIIYGLKMRBISKHLKLFAR  
OR.SCAF15134.1 VILPVVFILESYIRILLVSYQSSRE--V-RRKAAQCLPHLILINFSF-TIYDVLLIRLS---TTVPKTVRFLITLQIMMYQELFNPIIYGLKMRBISKHLKLFAR  
OR.SCAF14677.1 IALPCLLVILFVSYRLLVSYQSSRE--V-RRKAAQCLPHLILINFSF-TIYDVLLIRLS---TTVPKTVRFLITLQIMMYQELFNPIIYGLKMRBISKHLKLFAR  
OR.SCAF11408.5 LCSSIGSVLTYTKTITIVQVTSNSK-SV-NSKALKTCSTHLTVYLIMLIS-GCIVILMHR-----FPQYAEYRKLGGILFVIVPSSLNPIYGVQSKBIOKFLRKSTLL  
OR.SCAF11408.3 LCSSIGSVLTYTKTITIVQVTSNSK-SV-NSKALKTCSTHLTVYLIMLIS-GCIVILMHR-----FPQYAEYRKLGGILFVIVPSSLNPIYGVQSKBIOKFLRKSTLL  
OR.SCAF15002.3P QIISLTIQAFSYRLLVLAACRVSQRS-ET-KLKAIPCVACLMIIVIFEFV-FTFTLLSRFN---KNVSADLQKIMGMLIFLIPVLPVNPVYGLRDSQSFYVGRVYLLC  
OR.SCAF15002.4 QVVANWIMYTYLQQLVACFRSKHP-DT-KSKALQCATHLVFLLECL-GLFTIISYRL-----KDISPHFGKFMGMSTLIFPPTLNPFIYGLKTKBIREKLEAFCRN  
OR.SCAF15002.2P QGAPLAMMYTYAQLLYVGVSTKST-DA-RKKAICQCSHLLVYLLRKY~DYRVFIDLFIH~---GVMGX-----PNVHPSIRRAFGLSVLVFPPLDLEFIYGLRVKLLKGLKML---  
OR.SCAF15002.1 QGAPLAMMYTYAQLLYVGVSTKST-DA-RKKAICQCSHLLVYLLQVN-TLFTLLAHFN-----PNVHPSIRRAFGLSVLVFPPLDLEFIYGLRVKLLKGLKML---  
OR.SCAF14601.1 FWLPLLEFIILSYLYISCTLAKVANF-QR-GLKALKPCTGHLVAVIYFIP-LIITFTLM-----ENIHPNARIINLSLTSVFPPLNPIIYVLOQEBKDSLRLLKN  
OR.SCAF15001.1 LVAPPVFIIVLTYAHLTLLFRMKS-V-NS-RMKALSTCVHLLVAVFYIP-LFTIFIFGFYV---RLIDADLRVLSLSMASCIPPCINPIYSLKTKBIRKRAVALFRK  
OR.SCAF15002.5 LLLPLAFIVFVSYRLLVIMRRENG-AG-RRKTLSTCTQLFITCLFYLP-RCFVYVANTVG---FYFSVDVIRLLVLLVSLVPPAVNPEIYCFKTDQIKQTLIKKLRN  
OR.SCAF15002.6 LLVPLSFILESYRLLVAVLKTSON-DR-RYKVLSCPIQFVTVCLYYP-RCFVYIATDLG---FELSGETRTIVTMYSLMPEAMLEPIIYGLKTKBIREKLEAFCRN  
OR.SCAF14677.8 VGMDIPLIFVSYAKLLSVSRASVASED-RWKAFFTCGTHLVMVMCFYLV-GSVTFLSRNLN---IYIPADVNTFMGMVYILFPATVNPFIYGVRTTEIRNGFFKLCCK  
OR.SCAF10960.3 LVMVWITMFAVFRILVAAKTASD---AKKARNIIVLHSPQLLLCMAA-YLTPALRDALQRRFPE-NSVDVLFASVYLVQILPRSLSPVYVSRDQTFRRYLRVYLLR  
OR.SCAF10960.2 LLAVWLVIYTYFERILFTATSASD---SRKARRTIVLHGVOVLLCMAT-YAEPQLLQALQLWFFR-SYSDSLFACYIIVQILPRSPFIYGVDRDQTFRRYLRVYLLR  
OR.SCAF10960.5 FCCVFLTLEFTYKLVFAARATSTQRTS-AOKARKTILHGAQLFMCLLS-YVSPAEEVLLQLIFPG-QILEIRFANFLIVVLPVLPVNPVYGLRDSQSFYVGRVYLLC  
OR.SCAF10960.4 LGLVWSTLVYTYRLLVVAKAADGA---AKKARSILHAFQMLLSMLV-YVQPMVVGAGTMAPA-RLLLHFLIFLNLQMLPRFLSPEFIYGVDRDQTFRRYLRVYLLR  
OR.SCAF14536.1 FVSAGATILFVSYIGVTVAAKSASTDKTT-SOKARHLLHLVQLGLSLSS-TMYPILTALSRTVIRI VLVRVQIVLYVWFFILPRCLSALYIGIRDRTIRPVFFYCLCC  
OR.SCAF14536.4 FVSAGAAIFVSYIGVTVAAKSASTDKTT-SOKARHLLHLVQLGLSLSS-TLYTPILTALSRTVIRI VLVRVQIVLYVWFFILPRCLSALYIGIRDRTIRPVFFYCLCC  
OR.SCAF14536.2 FVSAGAAIFVSYIGVTVAAKSASTDKTT-SOKARHLLHLVQLGLSLSS-TLYTPILTALSRTVIRI VLVRVQIVLYVWFFILPRCLSALYIGIRDRTIRPVFFYCLCC  
OR.SCAF14536.3 FVSAGAAIFVSYIGVTVAAKSASTDKTT-SOKARHLLHLVQLGLSLSS-TLYTPILTALSRTVIRI VLVRVQIVLYVWFFILPRCLSALYIGIRDRTIRPVFFYCLCC  
OR.SCAF14536.5P FVSAGAAIFVSYIGVTVAAKSASTDKTT-SOKARHLLHLVQLGLSLSS-TAVHTNTDSIIKTNDEDVCVCTKFLYVCFILPRCLSALYIGIRDRTIRPVFFYCLCC  
OR.SCAF14825.1 FVSAGAAIFVSYIGVTVAAKSASTDKTT-SOKARHLLHLVQLGLSLSS-TLSTPFIALSTLVMSIALFRAQNVLYVCFILPRCLSALYIGIRDRTIRPVFFYCLCC  
OR.SCAF14448.1 FAVVAVVIETVMRILLETTRKLRQDRFS-VNRAMHVVLLHGFQLLSVLS-FTSP-ITETTLVLPNWLREDIAFNFYCFILIPRFLSPLIYGFDRDQTFRRYLRVYLLC  
OR.SCAF14955.1 FAVVAVVIETVMRILLETTRKLRQDRFS-VNRAMHVVLLHGFQLLSVLS-FTSP-ITETTLVLPNWLREDIAFNFYCFILIPRFLSPLIYGFDRDQTFRRYLRVYLLC  
OR.SCAF12434.1 FVIMLTLTILSYVYKIMKIAKAAASBEKTKSTFGLKQVILHSPQLLLCLLQWCPFTESVVFEN--DKVIFSYVRFNRYVVFYIAPRCLSALYIGLRDEKIFLAKVRVLFK

Figure S3

|                 | 340                                    | 350 | 360 |
|-----------------|----------------------------------------|-----|-----|
| OR.SCAF12348.1  | ..... ..... ..... ..... ..... ..... .. |     |     |
| OR.SCAF7360.1P  | K-----                                 |     |     |
| OR.SCAF11981.1  | K-----                                 |     |     |
| OR.SCAF8981.2   | KS-----                                |     |     |
| OR.SCAF8981.3   | KS-----                                |     |     |
| OR.SCAF13663.2P | KIXVCFQ-----                           |     |     |
| OR.SCAF7360.2P  | KRF-----                               |     |     |
| OR.SCAF14677.3  | REEPQKPPARS-----                       |     |     |
| OR.SCAF12097.1  | HKLGRLS-----                           |     |     |
| OR.SCAF12097.3  | HKLGRLS-----                           |     |     |
| OR.SCAF12097.2  | HKLGRLS-----                           |     |     |
| OR.SCAF12097.4P | QKILTQN-----                           |     |     |
| OR.SCAF14321.1  | PEKKV-----                             |     |     |
| OR.SCAF14370.1  | PEKKV-----                             |     |     |
| OR.SCAF14328.1  | PEKKV-----                             |     |     |
| OR.SCAF14339.1  | PEKKV-----                             |     |     |
| OR.SCAF14339.2  | PEK-----                               |     |     |
| OR.SCAF14534.1P | -----                                  |     |     |
| OR.SCAF14328.2  | PEK-----                               |     |     |
| OR.SCAF14703.1  | NKVLGERKAKTLRQPKSTG-----               |     |     |
| OR.SCAF14677.2  | EKLPRRFSK-----                         |     |     |
| OR.SCAF3073.1   | EKLPRRFSK-----                         |     |     |
| OR.SCAF14677.4P | EG-----                                |     |     |
| OR.SCAF14677.6  | EG-----                                |     |     |
| OR.SCAF14677.5P | -----                                  |     |     |
| OR.SCAF14677.7  | -----                                  |     |     |
| OR.SCAF8332.1   | NK-----                                |     |     |
| OR.SCAF15134.2  | KVLG-----                              |     |     |
| OR.SCAF15134.3  | KVLG-----                              |     |     |
| OR.SCAF15134.1  | KVLG-----                              |     |     |
| OR.SCAF14677.1  | GILQHR-----                            |     |     |
| OR.SCAF11408.5  | NKKSPFVIF-----                         |     |     |
| OR.SCAF11408.3  | IKRVSF-----                            |     |     |
| OR.SCAF15002.3P | RRVSV-----                             |     |     |
| OR.SCAF15002.4  | KFFKSLSGQ-----                         |     |     |
| OR.SCAF15002.2P | -----                                  |     |     |
| OR.SCAF15002.1  | -----                                  |     |     |
| OR.SCAF14601.1  | SQSLKWAQRKHPILPQPSGSR-----             |     |     |
| OR.SCAF15001.1  | HKIRAIKA-----                          |     |     |
| OR.SCAF15002.5  | TRIGTEVNVSF-----                       |     |     |
| OR.SCAF15002.6  | GKIHVFK-----                           |     |     |
| OR.SCAF14677.8  | RVKKLTKVSPVGKRQT-----                  |     |     |
| OR.SCAF10960.3  | WRR-----                               |     |     |
| OR.SCAF10960.2  | RAQRAPERPGDGGPKPAACFCLD-----           |     |     |
| OR.SCAF10960.6  | LRCRVQ-----GPKEAP-----                 |     |     |
| OR.SCAF10960.5  | RRSPA-----                             |     |     |
| OR.SCAF10960.4  | TRSQQGAPPPGRQAKARK-----                |     |     |
| OR.SCAF14536.1  | QLTISVFPKGYK-----                      |     |     |
| OR.SCAF14536.4  | RLTISVFPKGYK-----                      |     |     |
| OR.SCAF14536.2  | QLTISVFPKGYK-----                      |     |     |
| OR.SCAF14536.3  | QCNI SVFLAKGYK-----                    |     |     |
| OR.SCAF11324.1  | RLSHSVFPNKGYK-----                     |     |     |
| OR.SCAF14536.5P | QLTHSIFPNKGDQSFNSNRKK-----             |     |     |
| OR.SCAF14825.1  | RLTISILPAKGYK-----                     |     |     |
| OR.SCAF14448.1  | CSNRVGGGRCKP-----                      |     |     |
| OR.SCAF14955.1  | CSNRVGGGRCKP-----                      |     |     |
| OR.SCAF12434.1  | -LRW-----                              |     |     |

Figure S3
