# Supplementary material for: The odorant receptor repertoire of teleost fish
Source: PubMed Central journal article supplement (PMC1325023; doi:10.1186/1471-2164-6-173), 2005-12-06
Supplement: 1471-2164-6-173-S7.pdf [file 1471-2164-6-173-S7.pdf]

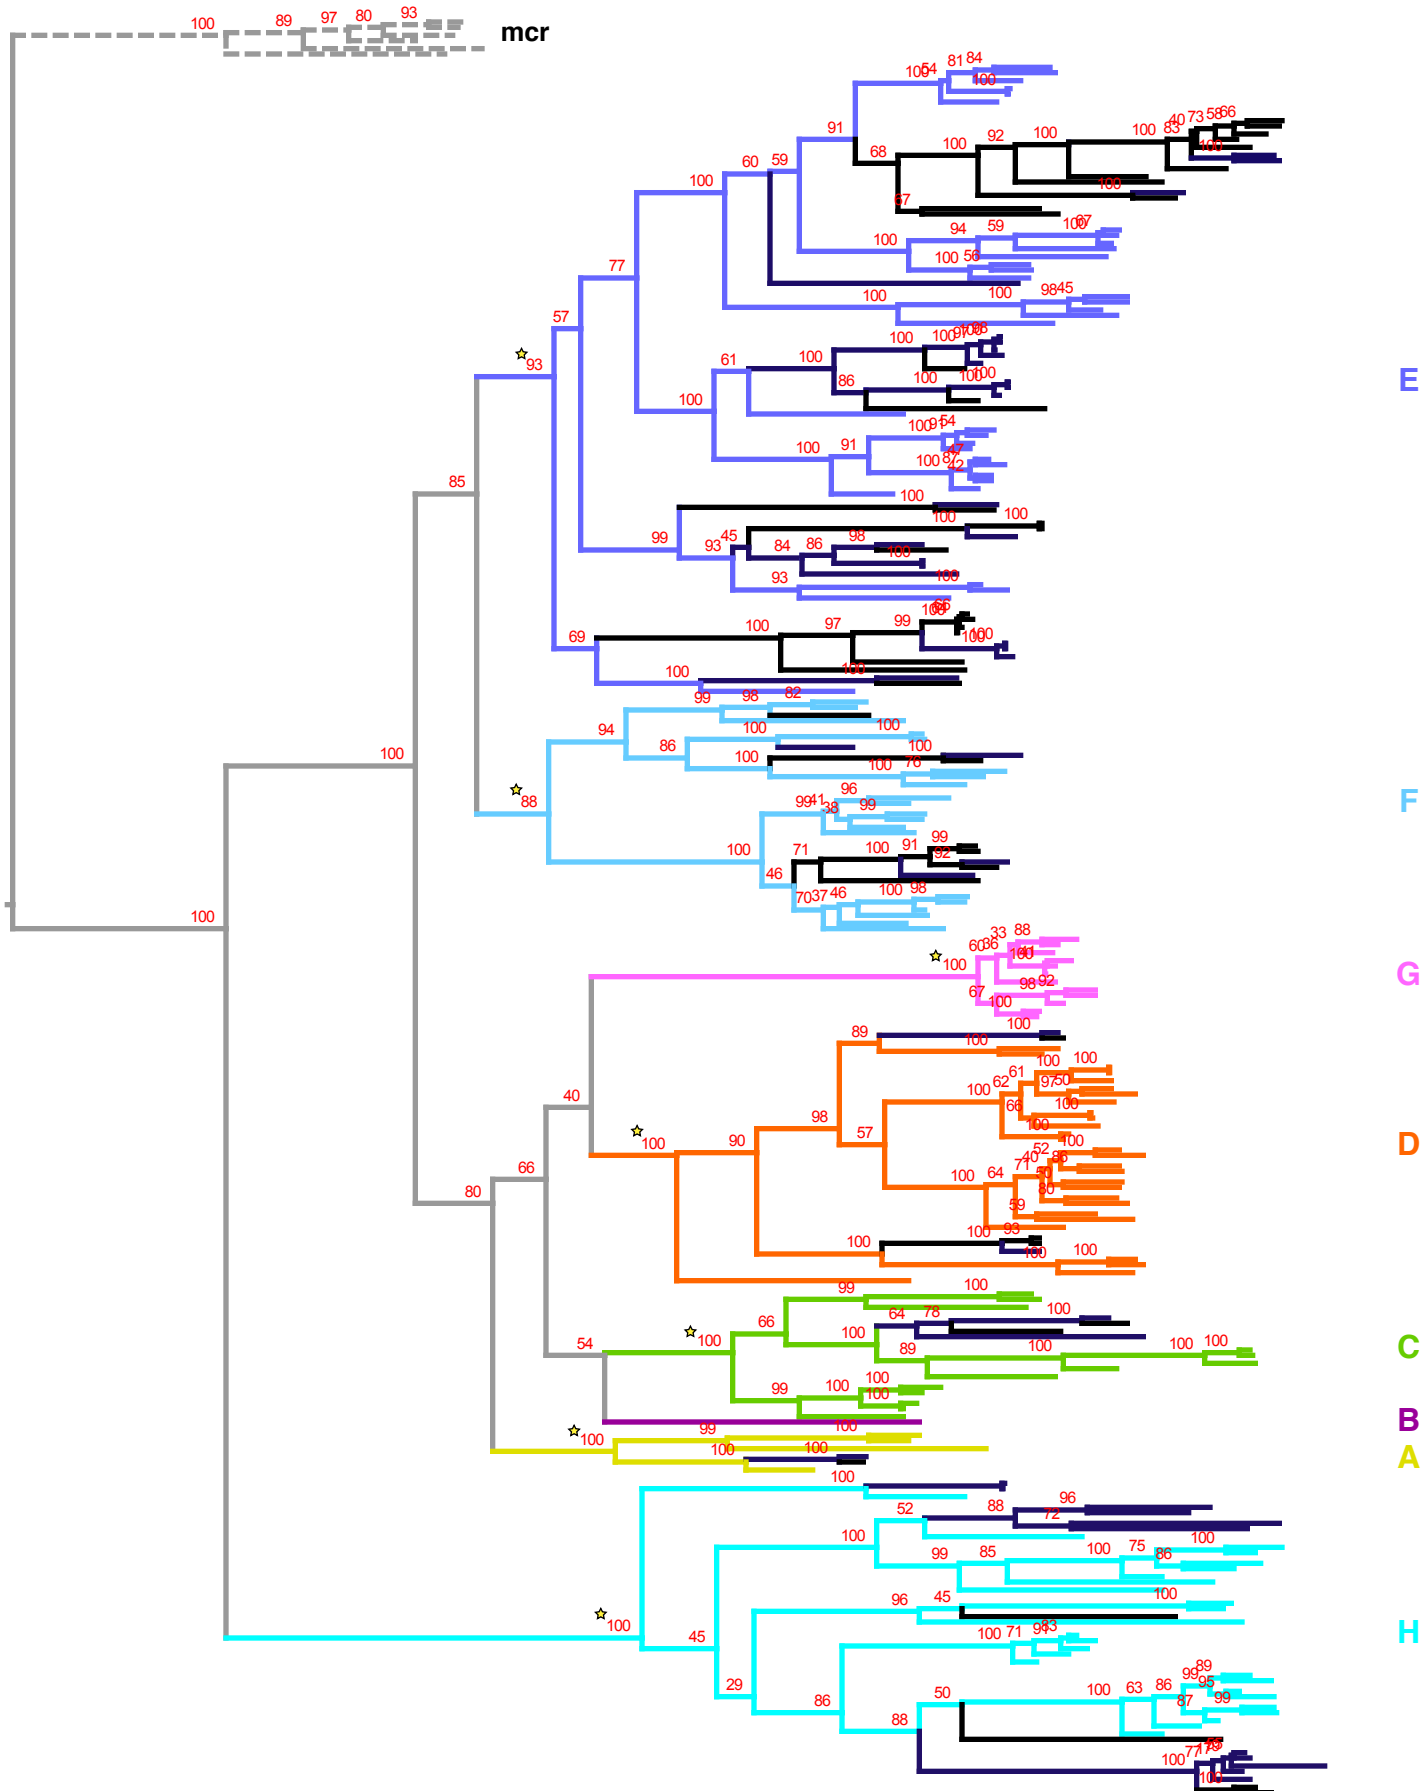

Figure S6
