# Supplementary material for: The odorant receptor repertoire of teleost fish
Source: PubMed Central journal article supplement (PMC1325023; doi:10.1186/1471-2164-6-173), 2005-12-06
Supplement: 1471-2164-6-173-S10.pdf [file 1471-2164-6-173-S10.pdf]

Table S1. The zebrafish OR repertoire

| OR Gene  | New Accession | Previous Name(s)                                              | Previous Name (f) | Previous Accession(s)         | EST Accession        | Classification | Gene/Pseudogene | Disruptions | Length (bp) | Annotated Location (Zv3/Zv4/BAC) | Zv4 Location                      | Chromosomal Location  |
|----------|---------------|---------------------------------------------------------------|-------------------|-------------------------------|----------------------|----------------|-----------------|-------------|-------------|----------------------------------|-----------------------------------|-----------------------|
| OR101-1  | DQ306041      | ZOR1 <sup>a</sup>                                             | Dr3OR5.4          | U72683                        |                      | full-length    | gene            | 0           | 951         | Zv4_scaffold1780:182071..183021  | Zv4_scaffold1780:182071..183021   | 21.39155728..39156678 |
| OR102-1  | DQ306109      | 5.1 <sup>c</sup><br>ZOR5 <sup>a</sup>                         | Dr3OR15.48        | NM_131740<br>U72687           | CO805971             | full-length    | gene            | 0           | 948         | ctg26:768131..769078             | Zv4_scaffold1337:932115..933062   | 15:27287344..27288291 |
| OR102-2  | DQ306110      | 5.3 <sup>c</sup>                                              | Dr3OR15.49        | NM_131739                     |                      | full-length    | gene            | 0           | 984         | ctg26:772174..773157             | Zv4_scaffold1337:936158..937141   | 15:27291387..27292370 |
| OR102-3  | DQ306111      | 5.4 <sup>c</sup>                                              | Dr3OR15.50        | NM_131739                     |                      | full-length    | gene            | 0           | 987         | ctg26:777452..778438             | Zv4_scaffold1337:941436..942422   | 15:27296665..27297651 |
| OR102-4  | DQ306112      |                                                               | Dr3OR15.51        |                               |                      | full-length    | gene            | 0           | 981         | ctg26:781993..782973             | Zv4_scaffold1337:945977..946957   | 15:27301206..27302186 |
| OR102-5  | DQ306114      | 5.2 <sup>c</sup>                                              | Dr3OR15.53        | NM_131737                     |                      | full-length    | gene            | 0           | 954         | ctg26:787119..788072             | Zv4_scaffold1337:951103..952056   | 15:27306332..27307285 |
| OR102-6P | DQ306113      |                                                               | Dr3OR15.52        |                               |                      | partial        | pseudogene      | 6           | 950         | ctg26:784842..785791             | Zv4_scaffold1337:948826..949775   | 15:27304055..27305004 |
| OR103-1  | DQ306104      | 13.1 <sup>a</sup><br>ZOR8 <sup>a</sup>                        | Dr3OR15.43        | NM_131588<br>U72690           |                      | full-length    | gene            | 0           | 987         | ctg26:731961..732947             | Zv4_scaffold1337:895945..896931   | 15:27251174..27252160 |
| OR103-2  | DQ306106      | 13.2                                                          | Dr3OR15.45        |                               |                      | full-length    | gene            | 0           | 945         | ctg26:741177..742121             | Zv4_scaffold1337:905161..906105   | 15:27260390..27261334 |
| OR103-3  | DQ306107      |                                                               | Dr3OR15.46        |                               |                      | full-length    | gene            | 0           | 963         | ctg26:743944..744906             | Zv4_scaffold1337:907928..908890   | 15:27263157..27264119 |
| OR103-4  | DQ306108      | 13.4 <sup>ab</sup>                                            | Dr3OR15.47        | NM_203469                     |                      | full-length    | gene            | 0           | 957         | ctg26:749834..750790             | Zv4_scaffold1337:913818..914774   | 15:27269047..27270003 |
| OR103-5  | DQ306105      |                                                               | Dr3OR15.44        |                               |                      | full-length    | gene            | 0           | 963         | ctg26:734376..735338             | Zv4_scaffold1337:898360..899322   | 15:27253589..27254551 |
| OR104-1  | DQ305993      |                                                               | Dr3OR10.1         |                               |                      | full-length    | gene            | 0           | 984         | Finished101:84610..85593         | Zv4_scaffold917:658328..659311    | 10:29465068..29466051 |
| OR104-2  | DQ305994      | ZOR10 <sup>a</sup>                                            | Dr3OR10.2         | U72692                        |                      | full-length    | gene            | 0           | 960         | Finished101:90370..91329         | Zv4_scaffold917:664088..665047    | 10:29470828..29471787 |
| OR105-1  | DQ305995      |                                                               | Dr3OR10.3         |                               |                      | full-length    | gene            | 0           | 978         | Finished101:94592..95569         | Zv4_scaffold917:668310..669287    | 10:29475050..29476027 |
| OR106-1  | DQ305996      |                                                               |                   |                               |                      | full-length    | gene            | 0           | 960         | Finished101:104926..105885       | Zv4_scaffold917:678644..679603    | 10:29485384..29486343 |
| OR106-2  | DQ305997      |                                                               | Dr3OR10.4         |                               |                      | full-length    | gene            | 0           | 963         | Finished101:110782..111744       | Zv4_scaffold917:684500..685462    | 10:29491240..29492202 |
| OR106-3  | DQ305998      |                                                               | Dr3OR10.5         |                               |                      | full-length    | gene            | 0           | 963         | Finished101:116562..117524       | Zv4_scaffold917:690280..691242    | 10:29497020..29497982 |
| OR106-4  | DQ305999      |                                                               | Dr3OR10.7         |                               |                      | full-length    | gene            | 0           | 951         | Finished101:125185..126135       | Zv4_scaffold917:698903..699853    | 10:29505643..29506593 |
| OR106-5  | DQ306000      |                                                               | Dr3OR10.8         |                               |                      | full-length    | gene            | 0           | 951         | Finished101:130449..131399       | Zv4_scaffold917:704167..705117    | 10:29510907..29511857 |
| OR106-6  | DQ306001      |                                                               | Dr3OR10.10        |                               |                      | full-length    | gene            | 0           | 981         | Finished101:136497..137477       | Zv4_scaffold917:710215..711195    | 10:29516955..29517935 |
| OR106-7  | DQ306002      |                                                               | Dr3OR10.11        |                               | AW232880             | full-length    | gene            | 0           | 978         | Finished101:139926..140903       | Zv4_scaffold917:713644..714621    | 10:29520384..29521361 |
| OR106-8  | DQ306003      |                                                               |                   |                               |                      | full-length    | gene            | 0           | 945         | Finished101:144861..145805       | Zv4_scaffold917:718579..719523    | 10:29525319..29526263 |
| OR106-9  | DQ306004      |                                                               | Dr3OR10.12        |                               |                      | full-length    | gene            | 0           | 942         | Finished101:153947..154888       | Zv4_scaffold917:727665..728606    | 10:29534405..29535346 |
| OR106-10 | DQ306005      |                                                               | Dr3OR10.13        |                               |                      | full-length    | gene            | 0           | 942         | Finished101:162197..163138       | Zv4_scaffold917:735915..736856    | 10:29542655..29543596 |
| OR106-11 | DQ306006      |                                                               | Dr3OR10.14        |                               |                      | full-length    | gene            | 0           | 948         | Finished101:167530..168477       | Zv4_scaffold917:741248..742195    | 10:29547988..29548935 |
| OR106-12 | DQ305986      |                                                               | Dr3OR10.15        |                               |                      | full-length    | gene            | 0           | 981         | BX088524:100734..101714          | Zv4_scaffold917:748197..749177    | 10:29554937..29555917 |
| OR107-1  | DQ306092      | 7.1 <sup>c</sup><br>ZOR9 <sup>a</sup><br>ORZF1A <sup>a</sup>  | Dr3OR15.30        | NM_131750<br>U72691<br>U44439 | CO958265             | full-length    | gene            | 0           | 996         | ctg26:649954..650949             | Zv4_scaffold1337:813938..814933   | 15:27169167..27170162 |
| OR108-1  | DQ305987      |                                                               |                   |                               |                      | full-length    | gene            | 0           | 966         | BX088524:171490..172455          | Zv4_scaffold917:841044..842009    | 10:29647784..29648749 |
| OR108-2  | DQ305988      |                                                               | Dr3OR6.2          |                               |                      | full-length    | gene            | 0           | 981         | BX088524:181241..182221          | Unknown                           | Unknown               |
| OR108-3  | DQ305989      |                                                               | Dr3OR6.1          |                               | CO803957             | full-length    | gene            | 0           | 978         | BX088524:187251..188228          | Unknown                           | Unknown               |
| OR109-1  | DQ306009      |                                                               | Dr3OR10.18        |                               |                      | full-length    | gene            | 0           | 990         | Finished101:192523..193512       | Zv4_scaffold917:766241..767230    | 10:29572981..29573970 |
| OR109-2  | DQ306010      |                                                               | Dr3OR10.19        |                               |                      | full-length    | gene            | 0           | 1011        | Finished101:196495..197505       | Zv4_scaffold917:770213..771223    | 10:29576953..29577963 |
| OR109-3  | DQ306011      |                                                               | Dr3OR10.20        |                               |                      | full-length    | gene            | 0           | 1005        | Finished101:201141..202145       | Zv4_scaffold917:774859..775863    | 10:29581599..29582603 |
| OR109-4  | DQ306012      |                                                               |                   |                               |                      | full-length    | gene            | 0           | 1017        | Finished101:205650..206666       | Zv4_scaffold917:779368..780384    | 10:29586108..29587124 |
| OR109-5  | DQ306013      |                                                               |                   |                               |                      | full-length    | gene            | 0           | 990         | Finished101:211674..212663       | Zv4_scaffold917:785392..786381    | 10:29592132..29593121 |
| OR109-6  | DQ306014      |                                                               |                   |                               |                      | full-length    | gene            | 0           | 978         | Finished101:214550..215527       | Zv4_scaffold917:788268..789245    | 10:29595008..29595985 |
| OR109-7  | DQ306015      |                                                               | Dr3OR10.21        |                               |                      | full-length    | gene            | 0           | 978         | Finished101:217578..218555       | Zv4_scaffold917:791296..792273    | 10:29598036..29599013 |
| OR109-8  | DQ306016      |                                                               | Dr3OR10.23        |                               |                      | full-length    | gene            | 0           | 1032        | Finished101:222852..223883       | Zv4_scaffold917:796570..797601    | 10:29603310..29604341 |
| OR109-9  | DQ306018      |                                                               | Dr3OR10.24        |                               |                      | full-length    | gene            | 0           | 978         | Finished101:239981..240958       | Zv4_scaffold917:813699..814676    | 10:29620439..29621416 |
| OR109-10 | DQ306019      |                                                               | Dr3OR6.3          |                               |                      | full-length    | gene            | 0           | 978         | Finished101:243012..243989       | Zv4_scaffold917:816730..817707    | 10:29623470..29624447 |
| OR109-11 | DQ306020      |                                                               | Dr3OR10.27        |                               |                      | full-length    | gene            | 0           | 999         | Finished101:248418..249416       | Zv4_scaffold917:822136..823134    | 10:29628876..29629874 |
| OR109-12 | DQ306017      |                                                               |                   |                               |                      | partial        | gene            | 0           | 975         | Finished101:231120..232094       | Zv4_scaffold917:830406..831380    | 10:29637146..29638120 |
| OR109-13 | DQ306021      |                                                               | Dr3OR10.25        |                               |                      | partial        | gene            | 0           | 975         | Finished101:256688..257662       | Zv4_scaffold917:830406..831380    | 10:29637146..29638120 |
| OR110-1  | DQ306007      | ZOR4 <sup>a</sup>                                             | Dr3OR10.16        | U72686                        | CO934527             | full-length    | gene            | 0           | 960         | Finished101:180476..181435       | Zv4_scaffold917:754194..755153    | 10:29560934..29561893 |
| OR110-2  | DQ306008      |                                                               | Dr3OR10.17        |                               | CO810947             | full-length    | gene            | 0           | 957         | Finished101:186537..187493       | Zv4_scaffold917:760255..761211    | 10:29566995..29567951 |
| OR111-1  | DQ306093      | 2.6 <sup>a</sup><br>ZF11 <sup>a</sup>                         | Dr3OR15.31        | NM_131593<br>U44440           | CN013862<br>CO804187 | full-length    | gene            | 0           | 981         | ctg26:656078..657058             | Zv4_scaffold1337:820062..821042   | 15:27175291..27176271 |
| OR111-2  | DQ306094      | 2.4 <sup>a</sup>                                              | Dr3OR15.32        | NM_131749                     |                      | full-length    | gene            | 0           | 981         | ctg26:661665..662645             | Zv4_scaffold1337:825649..826629   | 15:27180878..27181858 |
| OR111-3  | DQ306095      | 2.3 <sup>a</sup>                                              | Dr3OR15.34        | NM_131748                     | CO802197             | full-length    | gene            | 0           | 981         | ctg26:670643..671623             | Zv4_scaffold1337:834627..835607   | 15:27189856..27190836 |
| OR111-4  | DQ306096      | 2.7 <sup>a</sup>                                              | Dr3OR15.35        | NM_131747                     |                      | full-length    | gene            | 0           | 981         | ctg26:676414..677394             | Zv4_scaffold1337:840398..841378   | 15:27195627..27196607 |
| OR111-5  | DQ306097      | 2.2 <sup>a</sup>                                              | Dr3OR15.36        | NM_131592                     |                      | full-length    | gene            | 0           | 978         | ctg26:687576..688556             | Zv4_scaffold1337:851560..852540   | 15:27206789..27207769 |
| OR111-6  | DQ306098      | 2.5 <sup>a</sup>                                              | Dr3OR15.37        | NM_131746<br>U72689           | CO806965             | full-length    | gene            | 0           | 978         | ctg26:694934..695911             | Zv4_scaffold1337:858918..859895   | 15:27214147..27215124 |
| OR111-7  | DQ306099      | ZOR7 <sup>a</sup><br>2.1 <sup>ab</sup><br>ORZF39 <sup>a</sup> | Dr3OR15.38        | NM_131582<br>U44441           |                      | full-length    | gene            | 0           | 975         | ctg26:710239..711213             | Zv4_scaffold1337:1383322..1384296 | 15:27738551..27739525 |

Table S1. The zebrafish OR repertoire

|           |          |       |            |           |                                                                      |             |            |   |      |                                 |                                   |                       |
|-----------|----------|-------|------------|-----------|----------------------------------------------------------------------|-------------|------------|---|------|---------------------------------|-----------------------------------|-----------------------|
| OR111-8   | DQ306100 | 2.10° | Dr3OR15.39 | NM_152985 |                                                                      | full-length | gene       | 0 | 945  | ctg26:713020..713964            | Zv4_scaffold1337:1386103..1387047 | 15:27741332..27742276 |
| OR111-9   | DQ306101 | 2.9°  | Dr3OR15.40 | NM_131745 |                                                                      | full-length | gene       | 0 |      |                                 |                                   |                       |
| OR111-10  | DQ306102 | 2.11° | Dr3OR15.41 | NM_131581 |                                                                      | full-length | gene       | 0 | 981  | ctg26:717970..718950            | Zv4_scaffold1337:881954..882934   | 15:27237183..27238163 |
| OR111-11  | DQ306103 | 2.8°  | Dr3OR15.42 | NM_131744 | CN019319<br>CN013862                                                 | full-length | gene       | 0 | 978  | ctg26:723719..724696            | Zv4_scaffold1337:887703..888680   | 15:27242932..27243909 |
| OR112-1   | DQ306144 | ZOR6° | Dr3OR9.2   | U72688    |                                                                      | full-length | gene       | 0 | 984  | ctg9339:234905..235888          | Zv4_NA5952:16287..17270           | Unknown               |
| OR113-1   | DQ306079 |       |            |           |                                                                      | full-length | gene       | 0 | 954  | ctg25655:380111..381064         | Zv4_scaffold1495:340499..341452   | 17:28570443..28571396 |
| OR113-2   | DQ306080 |       |            |           |                                                                      | full-length | gene       | 0 | 954  | ctg25655:393664..394617         | Zv4_scaffold1495:353029..353982   | 17:28582973..28583926 |
| OR113-3   | DQ306082 |       |            |           |                                                                      | full-length | gene       | 1 | 947  | ctg25655:412946..413892         | Zv4_scaffold1495:371047..371993   | 17:28600991..28601937 |
| OR113-4   | DQ306083 |       |            |           |                                                                      | full-length | gene       | 1 | 950  | ctg25655:417801..418750         | Zv4_scaffold1495:375902..376851   | 17:28605846..28606795 |
| OR114-1   | DQ306081 |       |            |           |                                                                      | full-length | gene       | 0 | 945  | ctg25655:403808..404752         | Zv4_scaffold1495:362662..363606   | 17:28592606..28593550 |
| OR115-1   | DQ306039 | 9.4°  | Dr3OR5.1   | NM_131742 |                                                                      | full-length | gene       | 0 | 927  | Zv4_scaffold1780:165321..166247 | Zv4_scaffold1780:165321..166247   | 21:39138978..39139904 |
| OR115-2   | DQ306139 |       |            |           | CO808125                                                             | full-length | gene       | 0 | 939  | ctg30275:230082..231020         | Zv4_NA16841:5230..6168            | Unknown               |
| OR115-3P  | DQ306040 |       | Dr3OR5.3   |           |                                                                      | full-length | pseudogene | 2 | 931  | Zv4_scaffold1780:175166..176096 | Zv4_scaffold1780:175166..176096   | 21:39148823..39149753 |
| OR115-4P  | DQ306038 |       |            |           |                                                                      | full-length | pseudogene | 2 | 952  | Zv4_scaffold1780:162298..163249 | Zv4_scaffold1780:162298..163249   | 21:39135955..39136906 |
| OR115-5   | DQ306037 |       |            |           |                                                                      | full-length | gene       | 0 | 942  | Zv4_scaffold1780:155915..156856 | Zv4_scaffold1780:155915..156856   | 21:39129572..39130513 |
| OR115-6   | DQ306036 |       |            |           | CO800381                                                             | full-length | gene       | 0 | 948  | Zv4_scaffold1780:149818..150765 | Zv4_scaffold1780:149818..150765   | 21:39123475..39124422 |
| OR115-7   | DQ306035 |       |            |           | CN019933<br>CN024010<br>CO811577                                     | full-length | gene       | 0 | 942  | Zv4_scaffold1780:136998..137939 | Zv4_scaffold1780:136998..137939   | 21:39110655..39111596 |
| OR115-8   | DQ306034 |       |            |           | CO814811                                                             | full-length | gene       | 0 | 945  | Zv4_scaffold1780:126444..127388 | Zv4_scaffold1780:126444..127388   | 21:39100101..39101045 |
| OR115-9   | DQ306033 |       |            |           |                                                                      | full-length | gene       | 0 | 945  | Zv4_scaffold1780:114021..114965 | Zv4_scaffold1780:114021..114965   | 21:39087678..39088622 |
| OR115-10  | DQ306032 | 9.3°  |            | NM_131743 |                                                                      | full-length | gene       | 0 | 942  | Zv4_scaffold1780:110504..111445 | Zv4_scaffold1780:110504..111445   | 21:39084161..39085102 |
| OR115-11  | DQ306031 |       |            |           |                                                                      | full-length | gene       | 0 | 918  | Zv4_scaffold1780:106913..107830 | Zv4_scaffold1780:106913..107830   | 21:39080570..39081487 |
| OR115-12  | DQ306030 |       |            |           | CN015707<br>CN018705<br>CO925021<br>CO813267<br>CO933258<br>AW233446 | full-length | gene       | 0 | 939  | Zv4_scaffold1780:100073..101011 | Zv4_scaffold1780:100073..101011   | 21:39073730..39074668 |
| OR115-13  | DQ306029 |       |            |           |                                                                      | full-length | gene       | 0 | 939  | Zv4_scaffold1780:94044..94982   | Zv4_scaffold1780:94044..94982     | 21:39067701..39068639 |
| OR115-14  | DQ306028 | 9.1°  |            | NM_131741 |                                                                      | full-length | gene       | 0 | 939  | Zv4_scaffold1780:89657..90595   | Zv4_scaffold1780:89657..90595     | 21:39063314..39064252 |
| OR115-15* |          | 9.2°  |            | U42394    |                                                                      |             |            |   |      |                                 |                                   |                       |
| OR116-1   | DQ306084 |       | Dr3OR15.21 |           |                                                                      | full-length | gene       | 0 | 936  | ctg26:601804..602739            | Zv4_scaffold1337:765788..766723   | 15:27121017..27121952 |
| OR116-2   | DQ306085 |       | Dr3OR15.22 |           |                                                                      | full-length | gene       | 0 | 939  | ctg26:608663..609601            | Zv4_scaffold1337:772647..773585   | 15:27127876..27128814 |
| OR117-1   | DQ306086 |       | Dr3OR15.23 |           |                                                                      | full-length | gene       | 0 | 981  | ctg26:613175..614155            | Zv4_scaffold1337:777159..778139   | 15:27132388..27133368 |
| OR118-1   | DQ306087 |       | Dr3OR15.24 |           | CN022514                                                             | full-length | gene       | 0 | 939  | ctg26:617692..618630            | Zv4_scaffold1337:781676..782614   | 15:27136905..27137843 |
| OR118-2   | DQ306089 |       | Dr3OR15.27 |           |                                                                      | full-length | gene       | 0 | 939  | ctg26:627850..628788            | Zv4_scaffold1337:791834..792772   | 15:27147063..27148001 |
| OR118-3   | DQ306088 |       | Dr3OR15.26 |           |                                                                      | full-length | gene       | 0 | 942  | ctg26:623160..624101            | Zv4_scaffold1337:787144..788085   | 15:27142373..27143314 |
| OR119-1   | DQ306090 |       | Dr3OR15.28 |           | CN022514                                                             | full-length | gene       | 0 | 945  | ctg26:632860..633804            | Zv4_scaffold1337:796844..797788   | 15:27152073..27153017 |
| OR119-2   | DQ306091 | 4.1°  | Dr3OR15.29 | NM_131751 |                                                                      | full-length | gene       | 0 | 945  | ctg26:637953..638897            | Zv4_scaffold1337:801937..802881   | 15:27157166..27158110 |
| OR120-1   | DQ306022 |       |            |           | CO918338                                                             | full-length | gene       | 0 | 990  | NA266:6563..7552                | Zv4_scaffold1202:2598425..2599414 | 14:3375277..3376266   |
| OR121-1   | DQ306074 |       | Dr3OR17.2  |           |                                                                      | full-length | gene       | 0 | 939  | ctg13685:19469..20407           | Zv4_scaffold336:1956840..1957778  | Unknown               |
| OR121-2P  | DQ306075 |       | Dr3OR17.3  |           |                                                                      | partial     | pseudogene | 1 | 893  | ctg13685:20657..21549           | Zv4_scaffold336:1956999..1956591  | Unknown               |
| OR122-1   | DQ306073 |       | Dr3OR17.1  |           |                                                                      | full-length | gene       | 0 | 924  | ctg13685:11577..12547           | Zv4_scaffold336:1964462..1965432  | Unknown               |
| OR122-2   | DQ306023 | ZOR2° |            | U72684    |                                                                      | full-length | gene       | 0 | 924  | NA266:13132..14114              | Zv4_scaffold1202:2592134..2593116 | 14:3368886..3369968   |
| OR123-1   | DQ306120 |       | Dr3OR21.6  |           |                                                                      | full-length | gene       | 0 | 936  | ctg30187:265795..266730         | Zv4_scaffold1754:174451..175386   | 21:14030469..14031404 |
| OR124-1   | DQ306119 |       | Dr3OR21.5  |           |                                                                      | full-length | gene       | 0 | 927  | ctg30187:254003..254929         | Zv4_scaffold1754:162659..163585   | 21:14018677..14019603 |
| OR124-2   | DQ306118 |       | Dr3OR21.3  |           |                                                                      | full-length | gene       | 0 | 933  | ctg30187:249538..250470         | Zv4_scaffold1754:158194..159126   | 21:14014212..14015144 |
| OR124-3   | DQ305990 |       | Dr3OR21.4  |           |                                                                      | full-length | gene       | 0 | 933  | CR450844:107765..108697         | Unknown                           | Unknown               |
| OR124-4   | DQ305992 |       | Dr3OR21.1  |           |                                                                      | full-length | gene       | 0 | 942  | CR450844:119254..120195         | Zv4_scaffold1754:149639..150580   | 21:14005657..14006598 |
| OR124-5P  | DQ305991 |       | Dr3OR21.2  |           |                                                                      | partial     | pseudogene | 3 | 833  | CR450844:117521..118353         | Zv4_scaffold1754:151490..152321   | 21:14007508..14008339 |
| OR125-1   | DQ306121 |       | Dr3OR21.7  |           |                                                                      | full-length | gene       | 0 | 960  | ctg30187:269969..270928         | Zv4_scaffold1754:178625..179584   | 21:14034643..14035602 |
| OR125-2   | DQ306122 |       | Dr3OR21.8  |           |                                                                      | full-length | gene       | 0 | 921  | ctg30187:276567..277487         | Zv4_scaffold1754:185223..186143   | 21:14041241..14042161 |
| OR125-3   | DQ306123 |       | Dr3OR21.10 |           |                                                                      | full-length | gene       | 0 | 930  | ctg30187:286886..287815         | Zv4_scaffold1754:195542..196471   | 21:14051560..14052489 |
| OR125-4   | DQ306124 |       | Dr3OR21.11 |           |                                                                      | full-length | gene       | 0 | 924  | ctg30187:293934..294857         | Zv4_scaffold1754:202590..203513   | 21:14058608..14059531 |
| OR125-5   | DQ306125 |       | Dr3OR21.12 |           |                                                                      | full-length | gene       | 0 | 927  | ctg30187:300111..301037         | Zv4_scaffold1754:208767..209693   | 21:14064785..14065711 |
| OR125-6   | DQ306126 |       | Dr3OR21.14 |           |                                                                      | full-length | gene       | 0 | 954  | ctg30187:305680..306633         | Zv4_scaffold1754:214336..215289   | 21:14070354..14071307 |
| OR125-7   | DQ306127 |       | Dr3OR21.15 |           | CO935064                                                             | full-length | gene       | 0 | 936  | ctg30187:316124..317059         | Zv4_scaffold1754:224780..225715   | 21:14080798..14081733 |
| OR125-8   | DQ306128 |       | Dr3OR21.16 |           | AW077101<br>AW076855                                                 | full-length | gene       | 0 | 1026 | ctg30187:323370..324395         | Zv4_scaffold1754:232026..233051   | 21:14088044..14089069 |

Table S1. The zebrafish OR repertoire

|                       |          |                   |            |        |          |             |            |   |     |                            |                                   |                       |
|-----------------------|----------|-------------------|------------|--------|----------|-------------|------------|---|-----|----------------------------|-----------------------------------|-----------------------|
| OR126-1               | DQ306057 |                   | Dr3OR15.2  |        |          | full-length | gene       | 0 | 930 | ctg12310.23393..24322      | Zv4_scaffold1298.23393..24322     | 15:2947562..2948491   |
| OR126-2               | DQ306067 |                   | Dr3OR15.12 |        |          | full-length | gene       | 0 | 936 | ctg12310.83968..84903      | Zv4_scaffold1298.83968..84903     | 15:3008137..3009072   |
| OR126-3               | DQ306068 |                   | Dr3OR15.13 |        |          | full-length | gene       | 0 | 948 | ctg12310.91460..92407      | Zv4_scaffold1298.91460..92407     | 15:3015629..3016576   |
| OR126-4               | DQ306069 |                   | Dr3OR15.14 |        |          | full-length | gene       | 0 | 945 | ctg12310.96745..97689      | Zv4_scaffold1298.96745..97689     | 15:3020914..3021858   |
| OR126-5               | DQ306070 |                   | Dr3OR15.15 |        |          | full-length | gene       | 0 | 948 | ctg12310.103365..104312    | Zv4_scaffold1298.103365..104312   | 15:3027534..3028481   |
| OR126-7               | DQ306071 |                   | Dr3OR15.16 |        |          | partial     | gene       | 0 | 930 | ctg12310.110490..111419    | Zv4_scaffold1298.110490..111419   | 15:3034659..3035588   |
| OR127-1               | DQ306056 |                   | Dr3OR7.1   |        |          | full-length | gene       | 0 | 945 | ctg12310.12687..13631      | Zv4_scaffold1298.12687..13631     | 15:2936856..2937800   |
| OR128-1               | DQ306058 |                   | Dr3OR15.3  |        |          | full-length | gene       | 0 | 918 | ctg12310.30049..30966      | Zv4_scaffold1298.30049..30966     | 15:2954218..2955135   |
| OR128-2               | DQ306059 |                   | Dr3OR15.4  |        |          | full-length | gene       | 0 | 918 | ctg12310.36291..37208      | Zv4_scaffold1298.36291..37208     | 15:2960460..2961377   |
| OR128-3               | DQ306060 |                   | Dr3OR15.5  |        |          | full-length | gene       | 0 | 912 | ctg12310.45376..46287      | Zv4_scaffold1298.45376..46287     | 15:2969545..2970456   |
| OR128-4               | DQ306061 |                   | Dr3OR15.6  |        |          | full-length | gene       | 0 | 918 | ctg12310.52878..53795      | Zv4_scaffold1298.52878..53795     | 15:2977047..2977964   |
| OR128-5               | DQ306062 | ZOR3 <sup>a</sup> | Dr3OR15.7  | U72685 | CO811737 | full-length | gene       | 0 | 921 | ctg12310.58148..59068      | Zv4_scaffold1298.58148..59068     | 15:2982317..2983237   |
| OR128-6               | DQ306063 |                   | Dr3OR15.8  |        |          | full-length | gene       | 0 | 918 | ctg12310.62773..63690      | Zv4_scaffold1298.62773..63690     | 15:2986942..2987859   |
| OR128-7               | DQ306064 |                   | Dr3OR15.9  |        |          | full-length | gene       | 0 | 918 | ctg12310.67887..68804      | Zv4_scaffold1298.67887..68804     | 15:2992056..2992973   |
| OR128-8               | DQ306065 |                   | Dr3OR15.10 |        |          | full-length | gene       | 0 | 933 | ctg12310.72308..73240      | Zv4_scaffold1298.72308..73240     | 15:2996477..2997409   |
| OR128-9               | DQ306066 |                   | Dr3OR15.11 |        |          | full-length | gene       | 0 | 918 | ctg12310.77484..78401      | Zv4_scaffold1298.77484..78401     | 15:3001653..3002570   |
| OR128-10              | DQ306072 |                   | Dr3OR15.17 |        |          | full-length | gene       | 0 | 918 | ctg12310.118105..119022    | Zv4_scaffold1298.118105..119022   | 15:3042274..3043191   |
| OR128-11              | DQ306117 |                   |            |        |          | partial     | gene       | 0 | 803 | ctg26417.527381..528183    | Unknown                           | Unknown               |
| OR128-12              | DQ306024 |                   |            |        |          | partial     | gene       | 0 | 664 | NA3759.1879..2542          | Zv4_NA18305.1879..2542            | Unknown               |
| OR128-13              | DQ306025 |                   |            |        |          | full-length | gene       | 1 | 917 | NA3759.5326..6242          | Zv4_scaffold1202.5555006..5555922 | 14:6331858..6332774   |
| OR128-14 <sup>*</sup> |          |                   |            |        | CO927854 |             |            |   |     |                            |                                   |                       |
| OR129-1               | DQ306078 |                   |            |        |          | full-length | gene       | 0 | 948 | ctg23107.3279..4226        | Zv4_scaffold1309.726151..727098   | 15:9606636..9607583   |
| OR130-1               | DQ306145 |                   | Dr3OR13.1  |        |          | full-length | gene       | 0 | 948 | ctg9441.562507..563454     | Zv4_scaffold303.151346..152293    | 4:9370252..9371199    |
| OR131-1               | DQ306115 |                   | Dr3OR15.18 |        |          | full-length | gene       | 0 | 966 | ctg26293.212996..213961    | Zv4_NA9866.23192..24157           | Unknown               |
| OR131-2               | DQ306116 |                   | Dr3OR15.20 |        |          | full-length | gene       | 0 | 981 | ctg26293.228709..229689    | Zv4_NA9866.38751..39731           | Unknown               |
| OR132-1               | DQ306140 |                   | Dr3OR8.3   |        |          | full-length | gene       | 0 | 972 | ctg626.280661..281632      | Zv4_scaffold1759.576909..577880   | 21:16037286..16038257 |
| OR132-2               | DQ306141 |                   | Dr3OR8.4   |        |          | full-length | gene       | 0 | 969 | ctg626.293082..294050      | Zv4_scaffold1759.564491..565459   | 21:16024868..16025836 |
| OR132-3               | DQ306142 |                   | Dr3OR8.5   |        |          | full-length | gene       | 0 | 969 | ctg626.301578..302546      | Zv4_scaffold1759.556296..557264   | 21:16016673..16017641 |
| OR132-4               | DQ306143 |                   | Dr3OR8.6   |        |          | full-length | gene       | 0 | 969 | ctg626.312165..313133      | Zv4_scaffold1759.545800..546768   | 21:16006177..16007145 |
| OR132-5               | DQ306026 |                   |            |        |          | full-length | gene       | 0 | 969 | Zv4_NA13608.168926..168994 | Zv4_NA13608.168926..168994        | Unknown               |
| OR133-1               | DQ306129 |                   | Dr3OR21.19 |        |          | full-length | gene       | 0 | 963 | ctg30187.379740..380702    | Zv4_scaffold1754.288396..289358   | 21:14144414..14145376 |
| OR133-2               | DQ306130 |                   | Dr3OR21.20 |        |          | full-length | gene       | 1 | 930 | ctg30187.385596..386525    | Zv4_scaffold1754.294252..295181   | 21:14150270..14151199 |
| OR133-3               | DQ306131 |                   | Dr3OR21.1  |        |          | full-length | gene       | 0 | 948 | ctg30187.400224..401171    | Zv4_scaffold1754.308880..309827   | 21:14164898..14165845 |
| OR133-4               | DQ306132 |                   | Dr3OR21.22 |        |          | full-length | gene       | 0 | 954 | ctg30187.410288..411241    | Zv4_scaffold1754.318944..319897   | 21:14174962..14175915 |
| OR133-5               | DQ306134 |                   | Dr3OR21.24 |        |          | full-length | gene       | 0 | 966 | ctg30187.425349..426314    | Zv4_scaffold1754.334005..334970   | 21:14190023..14190988 |
| OR133-6               | DQ306135 |                   | Dr3OR21.25 |        |          | full-length | gene       | 0 | 954 | ctg30187.430427..431380    | Zv4_scaffold1754.339083..340036   | 21:14195101..14196054 |
| OR133-7               | DQ306136 |                   | Dr3OR21.26 |        |          | full-length | gene       | 0 | 951 | ctg30187.437711..438661    | Zv4_scaffold1758.1845..2795       | 21:13646298..13647248 |
| OR133-8               | DQ306137 |                   | Dr3OR21.28 |        |          | full-length | gene       | 0 | 951 | ctg30187.546525..547475    | Zv4_NA18046.37665..38615          | Unknown               |
| OR133-9               | DQ306138 |                   | Dr3OR21.29 |        |          | full-length | gene       | 0 | 957 | ctg30187.553092..554048    | Zv4_NA18046.44232..45188          | Unknown               |
| OR133-10              | DQ306133 |                   | Dr3OR21.23 |        |          | partial     | gene       | 0 | 813 | ctg30187.416193..417105    | Zv4_scaffold1754.324849..325761   | 21:14180867..14181779 |
| OR134-1               | DQ306048 |                   |            |        |          | full-length | gene       | 0 | 948 | ctg12183.126793..127740    | Zv4_NA16015.35286..36233          | Unknown               |
| OR135-1               | DQ306077 |                   | Dr3OR8.2   |        |          | full-length | gene       | 0 | 921 | ctg22761.1702936..1703856  | Zv4_scaffold737.1249245..1250165  | 8:30959750..30960670  |
| OR135-2               | DQ306076 |                   | Dr3OR8.1   |        |          | full-length | gene       | 1 | 933 | ctg22761.1689991..1690923  | Zv4_scaffold737.1236300..1237232  | 8:30946805..30947737  |
| OR136-1               | DQ306047 |                   |            |        |          | full-length | gene       | 0 | 954 | ctg12183.69987..70940      | Zv4_scaffold861.714798..715751    | 10:4458326..4459279   |
| OR136-2P              | DQ306046 |                   |            |        |          | full-length | pseudogene | 2 | 925 | ctg10290.223670..224594    | Zv4_scaffold1851.148800..149724   | Unknown               |
| OR137-1               | DQ306044 |                   | Dr3OR7.3   |        |          | full-length | gene       | 0 | 933 | ctg10290.204064..204996    | Zv4_scaffold1851.167877..168809   | Unknown               |
| OR137-2               | DQ306045 |                   | Dr3OR7.4   |        |          | full-length | gene       | 0 | 945 | ctg10290.209663..210607    | Zv4_scaffold1851.162571..163515   | Unknown               |
| OR137-3               | DQ306051 |                   |            |        |          | full-length | gene       | 0 | 933 | ctg12183.141392..142324    | Zv4_NA16015.20756..21688          | Unknown               |
| OR137-4               | DQ306053 |                   |            |        |          | full-length | gene       | 0 | 933 | ctg12183.151806..152738    | Zv4_NA16015.11182..12114          | Unknown               |
| OR137-5               | DQ306055 |                   |            |        |          | full-length | gene       | 0 | 933 | ctg12183.162936..163868    | Zv4_NA16015.52..984               | Unknown               |
| OR137-6P              | DQ306042 |                   |            |        |          | partial     | pseudogene | 2 | 836 | ctg10290.184071..184906    | Zv4_scaffold1851.186800..187635   | Unknown               |
| OR137-7               | DQ306043 |                   |            |        | CO810666 | full-length | gene       | 1 | 929 | ctg10290.190253..191181    | Zv4_scaffold1851.180525..181453   | Unknown               |
| OR137-8               | DQ306052 |                   |            |        |          | full-length | gene       | 1 | 932 | ctg12183.148100..149031    | Zv4_NA16015.14878..15809          | Unknown               |
| OR137-9               | DQ306054 |                   |            |        |          | partial     | gene       | 0 | 486 | ctg12183.160719..161204    | Zv4_NA16015.2716..3201            | Unknown               |
| OR138-1P              | DQ306027 |                   |            |        |          | partial     | pseudogene | 2 | 909 | Zv4_NA14809.3451..4359     | Zv4_NA14809.3451..4359            | Unknown               |
| OR139-1P              | DQ306049 |                   |            |        |          | partial     | pseudogene | 2 | 915 | ctg12183.133587..134501    | Zv4_NA16015.28525..29439          | Unknown               |
| OR140-1               | DQ306050 |                   |            |        |          | full-length | pseudogene | 4 | 939 | ctg12183.136912..137850    | Zv4_NA16015.25176..26114          | Unknown               |

<sup>a</sup>(Barth et al., 1996), <sup>b</sup>(Barth et al., 1997), <sup>c</sup>(Dugas and Ngai, 2001), <sup>d</sup>(Weth et al., 1996), <sup>e</sup>(Byrd et al., 1996), <sup>f</sup>(Nimura and Nei, 2005)

<sup>\*</sup>Not identified in this study
