# Supplementary material for: The odorant receptor repertoire of teleost fish
Source: PubMed Central journal article supplement (PMC1325023; doi:10.1186/1471-2164-6-173), 2005-12-06
Supplement: 1471-2164-6-173-S11.pdf [file 1471-2164-6-173-S11.pdf]

**Table S2. Pairwise intra-subfamily percent identities for zebrafish OR subfamilies.**

| <b>Subfamily</b> | <b>Average</b> | <b>Min</b> | <b>Max</b> |
|------------------|----------------|------------|------------|
| OR102            | 63             | 44         | 95         |
| OR103            | 75             | 62         | 96         |
| OR104            | 86             | 86         | 86         |
| OR106            | 79             | 69         | 97         |
| OR108            | 78             | 73         | 87         |
| OR109            | 76             | 69         | 100        |
| OR110            | 80             | 80         | 80         |
| OR111            | 72             | 64         | 86         |
| OR113            | 81             | 81         | 81         |
| OR115            | 65             | 53         | 88         |
| OR116            | 82             | 82         | 82         |
| OR118            | 74             | 72         | 77         |
| OR119            | 95             | 95         | 95         |
| OR122            | 91             | 91         | 91         |
| OR124            | 76             | 69         | 83         |
| OR125            | 66             | 55         | 94         |
| OR126            | 77             | 71         | 79         |
| OR128            | 74             | 63         | 93         |
| OR131            | 84             | 84         | 84         |
| OR132            | 84             | 80         | 92         |
| OR133            | 75             | 65         | 87         |
| OR137            | 71             | 65         | 83         |
