# Supplementary material for: The odorant receptor repertoire of teleost fish
Source: PubMed Central journal article supplement (PMC1325023; doi:10.1186/1471-2164-6-173), 2005-12-06
Supplement: 1471-2164-6-173-S12.pdf [file 1471-2164-6-173-S12.pdf]

**Table S3. Pairwise inter-subfamily percent identities for zebrafish OR subfamilies.**

| <b>Subfamily</b> | <b>Average</b> | <b>Min</b> | <b>Max</b> |
|------------------|----------------|------------|------------|
| OR101            | 37             | 27         | 44         |
| OR102            | 25             | 17         | 34         |
| OR103            | 29             | 22         | 38         |
| OR104            | 30             | 23         | 37         |
| OR105            | 28             | 21         | 38         |
| OR106            | 24             | 16         | 32         |
| OR107            | 29             | 23         | 34         |
| OR108            | 26             | 19         | 33         |
| OR109            | 29             | 21         | 40         |
| OR110            | 27             | 22         | 33         |
| OR111            | 28             | 20         | 37         |
| OR112            | 31             | 24         | 42         |
| OR113            | 28             | 22         | 39         |
| OR114            | 26             | 18         | 35         |
| OR115            | 28             | 21         | 35         |
| OR116            | 28             | 22         | 35         |
| OR117            | 27             | 21         | 32         |
| OR118            | 26             | 20         | 33         |
| OR119            | 28             | 22         | 38         |
| OR120            | 29             | 22         | 34         |
| OR121            | 28             | 21         | 33         |
| OR122            | 27             | 22         | 34         |
| OR123            | 27             | 22         | 32         |
| OR124            | 28             | 20         | 35         |
| OR125            | 27             | 20         | 34         |
| OR126            | 27             | 20         | 33         |
| OR127            | 26             | 20         | 32         |
| OR128            | 26             | 18         | 33         |
| OR129            | 17             | 11         | 22         |
| OR130            | 16             | 11         | 20         |
| OR131            | 17             | 12         | 22         |
| OR132            | 18             | 12         | 23         |
| OR133            | 18             | 12         | 24         |
| OR134            | 18             | 13         | 24         |
| OR135            | 18             | 13         | 23         |
| OR136            | 16             | 12         | 22         |
| OR137            | 17             | 12         | 23         |
