# Supplementary material for: The odorant receptor repertoire of teleost fish
Source: PubMed Central journal article supplement (PMC1325023; doi:10.1186/1471-2164-6-173), 2005-12-06
Supplement: 1471-2164-6-173-S13.pdf [file 1471-2164-6-173-S13.pdf]

**Table S4. Pairwise inter-group percent identities for zebrafish OR families and mouse Class I and Class II ORs.**

| <b>Comparison</b>         | <b>Average</b> | <b>Min</b> | <b>Max</b> |
|---------------------------|----------------|------------|------------|
| <u>Zebrafish:</u>         |                |            |            |
| Family A x B              | 29             | 28         | 31         |
| Family A x C              | 28             | 22         | 35         |
| Family A x D              | 28             | 20         | 34         |
| Family A x E              | 28             | 22         | 32         |
| Family A x F              | 28             | 24         | 33         |
| Family A x G              | 24             | 22         | 27         |
| Family A x H              | 18             | 12         | 22         |
| Family B x C              | 33             | 26         | 38         |
| Family B x D              | 29             | 25         | 33         |
| Family B x E              | 26             | 23         | 29         |
| Family B x F              | 28             | 24         | 33         |
| Family B x G              | 28             | 27         | 29         |
| Family B x H              | 18             | 15         | 21         |
| Family C x D              | 29             | 23         | 38         |
| Family C x E              | 26             | 20         | 31         |
| Family C x F              | 27             | 20         | 32         |
| Family C x G              | 28             | 25         | 33         |
| Family C x H              | 17             | 11         | 21         |
| Family D x E              | 26             | 19         | 34         |
| Family D x F              | 27             | 22         | 33         |
| Family D x G              | 27             | 23         | 35         |
| Family D x H              | 18             | 14         | 24         |
| Family E x F              | 31             | 26         | 38         |
| Family E x G              | 25             | 22         | 31         |
| Family E x H              | 18             | 13         | 25         |
| Family F x G              | 26             | 21         | 31         |
| Family F x H              | 20             | 14         | 26         |
| Family G x H              | 17             | 13         | 21         |
| <u>Mouse x Zebrafish:</u> |                |            |            |
| Class I x Family A        | 33             | 24         | 42         |
| Class I x Family B        | 32             | 27         | 39         |
| Class I x Family C        | 29             | 21         | 38         |
| Class I x Family D        | 29             | 22         | 37         |
| Class I x Family E        | 28             | 20         | 34         |
| Class I x Family F        | 29             | 22         | 38         |
| Class I x Family G        | 25             | 19         | 32         |
| Class I x Family H        | 17             | 12         | 22         |
| Class II x Family A       | 28             | 18         | 36         |
| Class II x Family B       | 38             | 30         | 44         |
| Class II x Family C       | 28             | 17         | 37         |
| Class II x Family D       | 28             | 19         | 40         |
| Class II x Family E       | 27             | 18         | 35         |
| Class II x Family F       | 28             | 20         | 35         |
| Class II x Family G       | 24             | 16         | 31         |
| Class II x Family H       | 18             | 11         | 24         |
| <u>Mouse:</u>             |                |            |            |
| ClassI x ClassII          | 29             | 19         | 39         |
